# Supplementary material for: A Comprehensive Curation Shows the Dynamic Evolutionary Patterns of Prokaryotic CRISPRs
Source: Hindawi journal article supplement (doi:10.1155/2016/7237053), 2016-01-01
Supplement: f1 [file 7237053.f1.pdf]

# **A comprehensive curation shows the dynamic evolutionary patterns of prokaryotic CRISPRs**

Guoqin Mai<sup>1,\*</sup>, Ruiquan Ge<sup>1,2,\*</sup>, Guoquan Sun<sup>1</sup>, Qinghan Meng<sup>1,2</sup>, Fengfeng Zhou<sup>3,1,#</sup>

<sup>1</sup> Shenzhen Institutes of Advanced Technology, and Key Lab for Health Informatics, Chinese Academy of Sciences,

<sup>2</sup> Shenzhen College of Advanced Technology, University of Chinese Academy of Sciences, Shenzhen, Guangdong, P.R. China, 518055.

<sup>3</sup> College of Computer Science and Technology, Jilin University, Changchun, Jilin, P.R. China, 130012.

\* These authors contribute equally to this work.

<sup>#</sup>To whom correspondence should be addressed. Corresponding author: Fengfeng Zhou, e-mail: FengfengZhou@gmail.com, or ffzhou@jlu.edu.cn. Web site: <http://www.healthinformatics-lab.org/ffzhou/>.

## Figure S1. Structure of a CRISPR.

**Structure of a CRISPR. DR is the direct repeat flanking the spacer sequence.** The grey box represents the DR sequence, and DRs of the same CRISPR are homologous to each other. The patterned boxes represent the spacer sequence.

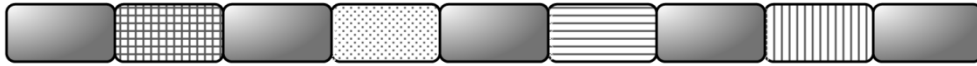

## Figure S2. 6 cases with one new DR

(a) CRISPRdb only detected 9 spacers for a CRISPR (NC\_010125\_2181482\_2182111) in the *Gluconacetobacter diazotrophicus* PAI 5, but we detected 10 spacers for this CRISPR (NC\_010125\_2181482\_2182177). (b) CRISPRdb only detected 28 spacers for a CRISPR (NC\_010125\_62935\_64832) in the *Gluconacetobacter diazotrophicus* PAI 5, but we detected 29 spacers for this CRISPR (NC\_010125\_62935\_64899). (c) CRISPRdb only detected 21 spacers for a CRISPR (NC\_010125\_2253747\_2255055) in the *Gluconacetobacter diazotrophicus* PAI 5, but we detected 22 spacers for this CRISPR (NC\_010125\_2253747\_2255112). (d) CRISPRdb only detected 28 spacers for a CRISPR (NC\_011365\_460172\_461907) in the *Gluconacetobacter diazotrophicus* PAI 5, but we detected 29 spacers for this CRISPR (NC\_011365\_460172\_461964\_29). (e) CRISPRdb only detected 3 spacers for a CRISPR (NC\_011365\_388303\_388536) in the *Gluconacetobacter diazotrophicus* PAI 5, but we detected 4 spacers for this CRISPR (NC\_011365\_388303\_388602). (f) CRISPRdb only detected 96 spacers for a CRISPR (NC\_008553\_670839\_677982) in the *Gluconacetobacter diazotrophicus* PAI 5, but we detected 97 spacers for this CRISPR (NC\_008553\_670839\_677982). The new spacers are marked by yellow background, and the new DRs are highlighted in red.

> *Gluconacetobacter diazotrophicus* PAI5\_NC\_010125\_2181482\_2182177\_10\_our results

|                                       |                                 |
|---------------------------------------|---------------------------------|
| AGCCTACCATCGGCAAAATCGGTAGGGAAACCACGGC | CTGGCCGGTAAATTGCGTGACGGCGGGTTC  |
| AGCCTACCATCGGCAAAATCGGTAGGGAAACCACGGC | ATCGCATGACCTTTGGTTTCGACCGGTAT   |
| AGCCTACCATCGGCAAAATCGGTAGGGAAACCACGGC | TCGAAGACCGCGCTGGACGACATGGGGAAG  |
| AGCCTACCATCGGCAAAATCGGTAGGGAAACCACGGC | CGATTCCGATACCTTGC GCGTGCGCACTGG |
| AGCCTACCATCGGCAAAATCGGTAGGGAAACCACGGC | GCAAGATAACGGCCTTCGGCCACACGAAGA  |
| AGCCTACCATCGGCAAAATCGGTAGGGAAACCACGGC | GCAGATTCGATACCGGCAACGACGGTCTT   |
| AGCCTACCATCGGCAAAATCGGTAGGGAAACCACGGC | GAGCGGAGGCAGCTTGTGGCCAATATGGC   |
| AGCCTACCATCGGCAAAATCGGTAGGGAAACCACGGC | GATCGCGCATGATGGCCGGATCAACGCTCA  |
| AGCCTACCATCGGCAAAATCGGTAGGGAAACCACGGC | ATCGAGCGCCGGCCGGACGTCGTTGTCGCC  |
| AGCCTACCATCGGCAAAATCGGTAGGGAAACCACGGC | CATGGTGTGAGCTTGC TCGGCGGTTTCTC  |
| AGCCTACCATCGGCAAAATCGGTAGGGAAACCACGGC |                                 |

> *Gluconacetobacter diazotrophicus* PAI5\_NC\_010125\_2181482\_2182111\_9\_gold standard

|                                       |                                 |
|---------------------------------------|---------------------------------|
| AGCCTACCATCGGCAAAATCGGTAGGGAAACCACGGC | CTGGCCGGTAAATTGCGTGACGGCGGGTTC  |
| AGCCTACCATCGGCAAAATCGGTAGGGAAACCACGGC | ATCGCATGACCTTTGGTTTCGACCGGTAT   |
| AGCCTACCATCGGCAAAATCGGTAGGGAAACCACGGC | TCGAAGACCGCGCTGGACGACATGGGGAAG  |
| AGCCTACCATCGGCAAAATCGGTAGGGAAACCACGGC | CGATTCCGATACCTTGC GCGTGCGCACTGG |
| AGCCTACCATCGGCAAAATCGGTAGGGAAACCACGGC | GCAAGATAACGGCCTTCGGCCACACGAAGA  |
| AGCCTACCATCGGCAAAATCGGTAGGGAAACCACGGC | GCAGATTCGATACCGGCAACGACGGTCTT   |
| AGCCTACCATCGGCAAAATCGGTAGGGAAACCACGGC | GAGCGGAGGCAGCTTGTGGCCAATATGGC   |
| AGCCTACCATCGGCAAAATCGGTAGGGAAACCACGGC | GATCGCGCATGATGGCCGGATCAACGCTCA  |
| AGCCTACCATCGGCAAAATCGGTAGGGAAACCACGGC | ATCGAGCGCCGGCCGGACGTCGTTGTCGCC  |

> *Gluconacetobacter diazotrophicus* PA15\_NC\_010125\_62935\_64899\_29\_our results

|                                  |                                      |
|----------------------------------|--------------------------------------|
| GTTTTAATCCCCGCTCCCGCTGGGGAGCGAC  | GACAACTTGC GACTCCTGTCCGACGCGGTCCGGC  |
| GTTTCAATCCACGCTCCCGCACAGGGAGCGAC | GGGTGCGATCCTCCGCATGGTGCAGGAGGACATC   |
| GTTTCAATCCACGCTCCCGCACAGGGAGCGAC | CGCCTCGTCGATGATGACGGGCGAATTCATCACGCC |
| GTTTCAATCCACGCTCCCGCACAGGGAGCGAC | GATCACGCGCACGCCAGCCACTCGTCGTAGG      |
| GTTTCAATCCACGCTCCCGCACAGGGAGCGAC | CAACTGTCCGATATCTCGGCCAATCTCTCCAACG   |
| GTTTCAATCCACGCTCCCGCACAGGGAGCGAC | CGTTTCTCGATACGCGGTCCAATCCCCTCCTTCTT  |
| GTTTCAATCCACGCTCCCGCACAGGGAGCGAC | CAACGTCTCCGACCCTTGACGTGGTCTCACGCCT   |
| GTTTCAATCCACGCTCCCGCACAGGGAGCGAC | GAGCCGGGACGAGCGTGAATCCTGCTGCGCCG     |
| .....                            |                                      |
| GTTTCAATCCACGCTCCCGCACAGGGAGCGAC | CTTCTGTTCCGCATCGCCGGCGGTCTGGTCCG     |
| GTTTCAATCCACGCTCCCGCACAGGGAGCGAC | AAGATCCAATGTCCTTCCAAGCGCATTCCCTAAAT  |
| GTTTCAATCCACGCTCCCGCACAGGGAGCGAC | GGGAAACGAACCGTGATGTCGTGGCGAAAGAAAG   |
| GTTTCAATCCACGCTCCCGCACAGGGAGCGAC |                                      |



> *Gluconacetobacter diazotrophicus* PA15\_NC\_010125\_62935\_64832\_28\_gold standard

|                                  |                                      |
|----------------------------------|--------------------------------------|
| GTTTTAATCCCCGCTCCCGCTGGGGAGCGAC  | GACAACTTGC GACTCCTGTCCGACGCGGTCCGGC  |
| GTTTCAATCCACGCTCCCGCACAGGGAGCGAC | GGGTGCGATCCTCCGCATGGTGCAGGAGGACATC   |
| GTTTCAATCCACGCTCCCGCACAGGGAGCGAC | CGCCTCGTCGATGATGACGGGCGAATTCATCACGCC |
| GTTTCAATCCACGCTCCCGCACAGGGAGCGAC | GATCACGCGCACGCCAGCCACTCGTCGTAGG      |
| GTTTCAATCCACGCTCCCGCACAGGGAGCGAC | CAACTGTCCGATATCTCGGCCAATCTCTCCAACG   |
| GTTTCAATCCACGCTCCCGCACAGGGAGCGAC | CGTTTCTCGATACGCGGTCCAATCCCCTCCTTCTT  |
| GTTTCAATCCACGCTCCCGCACAGGGAGCGAC | CAACGTCTCCGACCCTTGACGTGGTCTCACGCCT   |
| GTTTCAATCCACGCTCCCGCACAGGGAGCGAC | GAGCCGGGACGAGCGTGAATCCTGCTGCGCCG     |
| .....                            |                                      |
| GTTTCAATCCACGCTCCCGCACAGGGAGCGAC | CTTCTGTTCCGCATCGCCGGCGGTCTGGTCCG     |
| GTTTCAATCCACGCTCCCGCACAGGGAGCGAC | AAGATCCAATGTCCTTCCAAGCGCATTCCCTAAAT  |
| GTTTCAATCCACGCTCCCGCACAGGGAGCGAC |                                      |

> *Gluconacetobacter diazotrophicus* PA15\_NC\_010125\_2253747\_2255112\_22\_our results

|                                |                                  |
|--------------------------------|----------------------------------|
| AGATTCATCCCTGCATATGCGAGGAACAC  | AAGGCGGCCTCGTCCAGGATCACCAGACCCTG |
| CGGTTTATCCCCGCACGTGCGGGGAACACG | TCCCCCTGCTCGGCAACCCCAAATCAAGAT   |
| CGGTTTATCCCCGCACGTGCGGGGAACAC  | GCCGCGACGGTGAAGGGGAGGTTGTTGACGC  |
| CGGTTTATCCCCGCACGTGCGGGGAACAC  | GAGTCAACGGATTCCCACTCATCCTAATATC  |
| CGGTTTATCCCCGCACGTGCGGGGAACAC  | CTTTTCTCAGCCGACACTCTCCATGCAAGAAC |
| CGGTTTATCCCCGCACGTGCGGGGAACAC  | ACGCGGGTCTATGAGATTCCGATCATGCAGGA |
| CGGTTTATCCCCGCACGTGCGGGGAACAC  | CATTGACCCGGCACCTCCCATGTGACGTTT   |
| CGGTTTATCCCCGCACGTGCGGGGAACAC  | TGGCTCGGACCATCTTAGCGGACGACATGGC  |
| .....                          |                                  |
| CGGTTTATCCCCGCACGTGCGGGGAACAC  | TTGCGTCAAACGAAGCAATATCAGGGCAG    |
| CGGTTTATCCCCGCACGTGCGGGGAACAC  | TTGCCTCTAACGAGGCGCAGTATCAGGCACAG |
| CGGTTTATCCCCGCACGTGCGGGGAACAC  | CCGTCGTTTCGATCGTACAGGGGATCATCGGC |
| CGGTTTATCCCCGCACGTGCGGGGA      |                                  |



> *Gluconacetobacter diazotrophicus* PA15\_NC\_010125\_2253747\_2255055\_21\_gold standard

|                                |                                  |
|--------------------------------|----------------------------------|
| AGATTCATCCCTGCATATGCGAGGAACAC  | AAGGCGGCCTCGTCCAGGATCACCAGACCCTG |
| CGGTTTATCCCCGCACGTGCGGGGAACACG | TCCCCCTGCTCGGCAACCCCAAATCAAGAT   |
| CGGTTTATCCCCGCACGTGCGGGGAACAC  | GCCGCGACGGTGAAGGGGAGGTTGTTGACGC  |
| CGGTTTATCCCCGCACGTGCGGGGAACAC  | GAGTCAACGGATTCCCACTCATCCTAATATC  |
| CGGTTTATCCCCGCACGTGCGGGGAACAC  | CTTTTCTCAGCCGACACTCTCCATGCAAGAAC |
| CGGTTTATCCCCGCACGTGCGGGGAACAC  | ACGCGGGTCTATGAGATTCCGATCATGCAGGA |
| CGGTTTATCCCCGCACGTGCGGGGAACAC  | CATTGACCCGGCACCTCCCATGTGACGTTT   |
| CGGTTTATCCCCGCACGTGCGGGGAACAC  | TGGCTCGGACCATCTTAGCGGACGACATGGC  |
| .....                          |                                  |
| CGGTTTATCCCCGCACGTGCGGGGAACAC  | TTGCGTCAAACGAAGCAATATCAGGGCAG    |
| CGGTTTATCCCCGCACGTGCGGGGAACAC  | TTGCCTCTAACGAGGCGCAGTATCAGGCACAG |
| CGGTTTATCCCCGCACGTGCGGGGAACAC  |                                  |

> *Gluconacetobacter diazotrophicus* PA15\_NC\_011365\_460172\_461964\_29\_our results

|                            |                                      |
|----------------------------|--------------------------------------|
| AGATTCATCCCTGCATATGCGAGGA  | ACACAAGGCGGCCTCGTCCAGGATCACCAGACCCTG |
| CGGTTTCATCCCCGCACGTGCGGGAA | CACGTCCCCTGCTCGGCAACCCAACTCAAGAT     |
| CGGTTTCATCCCCGCACGTGCGGGAA | ACACGCCGCGACGGTGAAGGGGAGGTGTTCGACGC  |
| CGGTTTCATCCCCGCACGTGCGGGAA | ACACCCTGATCCTGCGCCGACGCCGAACCAGTCCG  |
| CGGTTTCATCCCCGCACGTGCGGGAA | ACACGCCGCGACGGTGAAGGGGAGGTGTTCGACGC  |
| CGGTTTCATCCCCGCACGTGCGGGAA | ACACCCTGATCCTGCGCCGACGCCGAACCAGTCCG  |
| CGGTTTCATCCCCGCACGTGCGGGAA | ACACGAGTACCCGATTCCCATCTCATCCTAAATATC |
| CGGTTTCATCCCCGCACGTGCGGGAA | ACACCTTTTCTCAGCCGACACTCTCCATGCAAGAAC |
| .....                      |                                      |
| CGGTTTCATCCCCGCACGTGCGGGAA | ACACAACGTGGAATGGCACCAGATCGAAACGATGCT |
| CGGTTTCATCCCCGCACGTGCGGGAA | ACACGCGAAGACCTGCGCCTGGAGCGCCTGCTTGTG |
| CGGTTTCATCCCCGCACGTGCGGGAA | ACACCGTGGGAATATCCTGACACACATGGGCGT    |
| CGGTTTCATCCCCGCACGTGCGGGAA |                                      |

> *Gluconacetobacter diazotrophicus* PA15\_NC\_011365\_460172\_461907\_28\_gold standard

|                            |                                      |
|----------------------------|--------------------------------------|
| AGATTCATCCCTGCATATGCGAGGA  | ACACAAGGCGGCCTCGTCCAGGATCACCAGACCCTG |
| CGGTTTCATCCCCGCACGTGCGGGAA | CACGTCCCCTGCTCGGCAACCCAACTCAAGAT     |
| CGGTTTCATCCCCGCACGTGCGGGAA | ACACGCCGCGACGGTGAAGGGGAGGTGTTCGACGC  |
| CGGTTTCATCCCCGCACGTGCGGGAA | ACACCCTGATCCTGCGCCGACGCCGAACCAGTCCG  |
| CGGTTTCATCCCCGCACGTGCGGGAA | ACACGCCGCGACGGTGAAGGGGAGGTGTTCGACGC  |
| CGGTTTCATCCCCGCACGTGCGGGAA | ACACCCTGATCCTGCGCCGACGCCGAACCAGTCCG  |
| CGGTTTCATCCCCGCACGTGCGGGAA | ACACGAGTACCCGATTCCCATCTCATCCTAAATATC |
| CGGTTTCATCCCCGCACGTGCGGGAA | ACACCTTTTCTCAGCCGACACTCTCCATGCAAGAAC |
| .....                      |                                      |
| CGGTTTCATCCCCGCACGTGCGGGAA | ACACAACGTGGAATGGCACCAGATCGAAACGATGCT |
| CGGTTTCATCCCCGCACGTGCGGGAA | ACACGCGAAGACCTGCGCCTGGAGCGCCTGCTTGTG |
| CGGTTTCATCCCCGCACGTGCGGGAA |                                      |

> *Gluconacetobacter diazotrophicus* PA15\_NC\_011365\_388303\_388602\_4\_our results

|                                      |                                |
|--------------------------------------|--------------------------------|
| AGCCTACCATCGGCAAAATCGGTAGGGAAACACGGC | TCAGCCGGCTGGGCATTGCCCTACGAGAGG |
| AGCCTACCATCGGCAAAATCGGTAGGGAAACACGGC | AGGGGAGCGGTACCTTCGACAAGGGCCT   |
| AGCCTACCATCGGCAAAATCGGTAGGGAAACACGGC | CCTCGTTGCTCGCGCGCGGGTGCAGGGCTG |
| AGCCTACCATCGGCAAAATCGGTAGGGAAACACGGC | TCCGCACGFTCACGCGTACCAGCATCGCGG |
| AGCCTACCATCGGCAAAATCGGTAGGGAAACACGGC |                                |

> *Gluconacetobacter diazotrophicus* PA15\_NC\_011365\_388303\_388536\_3\_gold standard

|                                      |                                |
|--------------------------------------|--------------------------------|
| AGCCTACCATCGGCAAAATCGGTAGGGAAACACGGC | TCAGCCGGCTGGGCATTGCCCTACGAGAGG |
| AGCCTACCATCGGCAAAATCGGTAGGGAAACACGGC | AGGGGAGCGGTACCTTCGACAAGGGCCT   |
| AGCCTACCATCGGCAAAATCGGTAGGGAAACACGGC | CCTCGTTGCTCGCGCGCGGGTGCAGGGCTG |
| AGCCTACCATCGGCAAAATCGGTAGGGAAACACGGC |                                |

```

GTCGAAGAGCGAGTTCCAGGAAAACAAGGATTGAAAC TTTCCGGATTAGAATAATAAGGAACTCCGGTACGGG
GTCGAAGAGCGAGTTCCAGGAAAACAAGGATTGAAAC GGTATACTAAGCGTACCGTTCGTCTCAACATCGACTA
GTCGAAGAGCGAGTTCCAGGAAAACAAGGATTGAAAC ACACCATATGCTCCGGGCAGAGGAGCATGTTCAACT
GTCGAAGAGCGAGTTCCAGGAAAACAAGGATTGAAAC CCAGTCTCCTCCTCAGGAGGACTGGCTTTTCAA
GTCGAAGAGCGAGTTCCAGGAAAACAAGGATTGAAAC CACAATAAATCCCCCTTGA AAAACGAGTTCAAGC
GTCGAAGAGCGAGTTCCAGGAAAACAAGGATTGAAAC TATGTAGCTGCATATCTACACCTCCACGGATATAAGAG
GTCGAAGAGCGAGTTCCAGGAAAACAAGGATTGAAAC TCTTCTGGCTCTGGCACGGCGAGA ACTATCTCGCCGT
GTCGAAGAGCGAGTTCCAGGAAAACAAGGATTGAAAC TCCAAATTACCAAGACAAACATGCTTGT CATGGGTG
.....
GTCGAAGAGCGAGTTCCAGGAAAACAAGGATTGAAAC GCCCATATCTCTTCGTGATGCTCCGGGTCTGCTG
GTCGAAGAGCGAGTTCCAGGAAAACAAGGATTGAAAC AGCAGCATCTTTTTCACCTCATGATATCATTATGAC
GTCGAAGAGCGAGTTCCAGGAAAACAAGGATTGAAAC TTTCTATACTGGGGATGTGTACTTCTTGCCTTCCTT
GTCGAAGAGCGAGTTCCAGGAAAACAAGGATTGAAAC

```

> *Methanosaeta thermophila* PT\_ NC\_008553\_670839\_677982\_97\_our results

> *Methanosaeta thermophila* PT\_ NC\_008553\_670839\_677982\_96\_gold standard

### Figure S3. 4 cases with two new DRs

(a) CRISPRdb only detected 26 spacers for a CRISPR (NC\_014152\_2078344\_2080300) in the *Thermincola sp.* JR, but we propose two more DRs for this CRISPR, , although one of the two new DRs is identical to the other DRs in half of its region. These two new spacers comes from their BLAST matches to two known spacers in the other genomes in the SpacerDB with 91.3% and 94.4% in matching identity percentages, respectively. The CRISPRs, *i.e.* NC\_015865\_1907425\_1908328 in *Thermococcus sp.* 4557 (b), NC\_015738\_2085666\_2087297 in *Eggerthella sp.* YY7918 (c), and NC\_014209\_791663\_793738 in *Thermoanaerobacter mathranii subsp. mathranii str. A3* (d), are also expanded with two more DRs. The new spacers are marked by yellow background, and the new DRs are highlighted in red.

> *Thermincola sp.* JR\_NC\_014152\_2078201\_2080300\_28\_our results

```

TTTCGTCCTCCCTACGGGGATAAGGAAGATTA AAC TCTTTGGCAAAGGCAAAACATCAGTTGACAGTTGACA ← 146bp
TTAACAGTTAACAGTTGAGATAAGGAAGATCA AAC TCTTTGGCAAAGGCAAAATATATCATTTCGGCAACCCAAA
TTTCGTCCTCCCTACGGGGATAAGGAAGATTA AAC GCAAAACCCCGGAACAGGCCCGGGGATGGGACC
GTTTCGTCCTCCCTACGGGGATAAGGAAGATTA AAC TAAATCCGAATGGATACTATTCTTGTCCAGATGCTG
.....
GTTTCGTCCTCCCTACGGGGATAAGGAAGATTA AAC ATGAATTAAGGATGGAATAGTTAATTCGACACAGT
GTTTCGTCCTCCCTACGGGGATAAGGAAGATTA AAC

```

aag gcaaacatcagttgacagtt  
|||||  
aag gcaaacatcaattg-cagtt 91.3%\_NC\_003106\_6\_11\_spacer

gcaaaaggcaaaatatca  
|||||  
gcaaaaggcaaa-atatca 94.4%\_NC\_015555\_4\_102\_spacer

*Thermincola sp.* JR\_NC\_014152\_2078344\_2080300\_26\_gold standard

> *Thermococcus sp.* 4557\_NC\_015865\_1907425\_1908328\_13\_our results

```

GTTGCAATAAGACTCTGGGAGAATTGAAAG TCGGGAACGCCAAGTTTATTACGGCGCCGATTACCT
GTTGCAATAAGACTCTGGGAGAATTGAAAG CCGTTGGCTCATCGGTAGAAACGGGCTCATCTATAATC
.....
GTTGCAATAAGACTCTGGGAGAATTGAAAG CAGGCGCTCAGGGCCGGGACATACGGGTGCGCCG
GTTGCAACAAGACTCTCTAGGAGAATTGAAA TGGTGACGATGATGGCCCTGCTCCCTGCTCCACTTGG ← 136bp
GTTGCAATAAGACCCCAAGGAGATCGAAAG

```

*Thermococcus sp.* 4557\_NC\_015865\_1907425\_1908192\_11\_gold standard

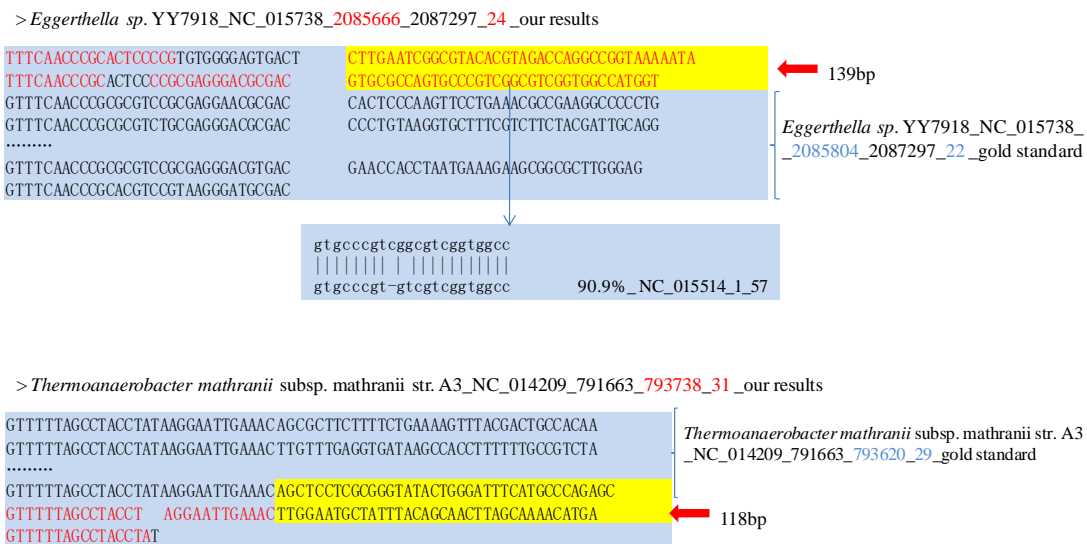

### Figure S4. 3 cases of long spacers with a partial DR

- (a) A CRISPR in *Oscillatoria acuminata* PCC 6304 has a long spacer with a truncated DR inside.
- (b) A CRISPR in *Chlorobium phaeobacteroides* DSM 266 has a long spacer with a truncated DR inside.
- (c) A CRISPR in *Frankia* sp. Cc13 has a long spacer with a truncated DR inside. The long spacer is in yellow and the truncated DR is in red. DRs and spacers are represented in the left and right columns, respectively.

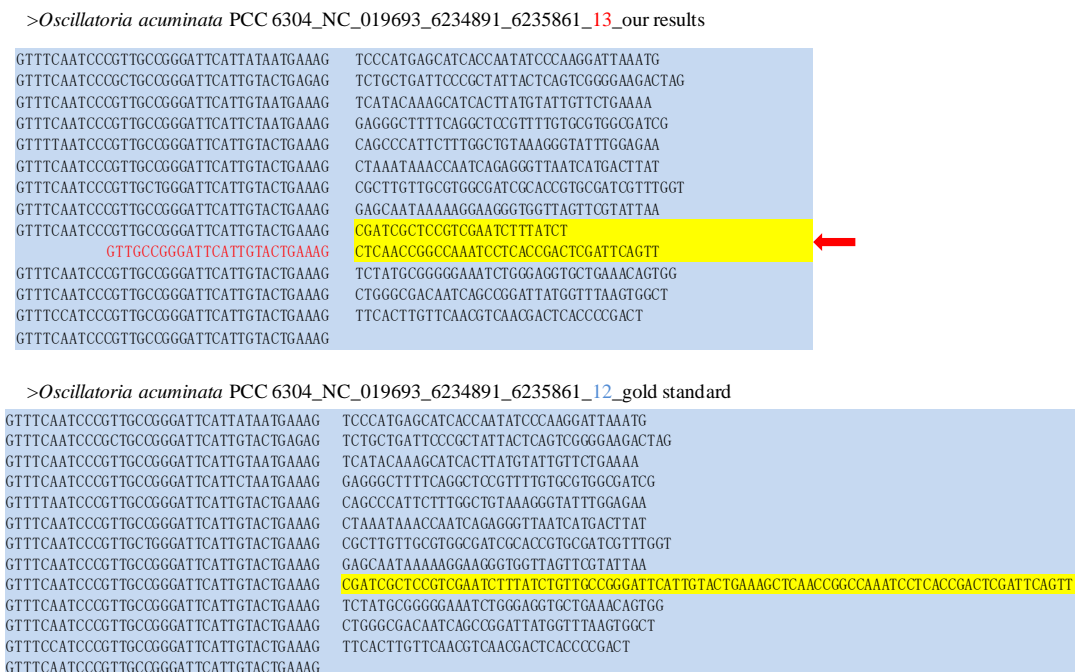

>Chlorobium phaeobacteroides DSM 266\_NC\_008639\_1625359\_1633049\_115\_our results

|                                     |                                           |
|-------------------------------------|-------------------------------------------|
| GTTTCAATCCACGGCCCGCAGGGGGCGGAC      | AGGCTATCCGTATCTGGCTTTACGCTGTGAAGCT        |
| GTTTCAATCCACGGCCCGCAGGGGGCGGAC      | CTGTCAATGATGGCCGATGATTCCCGTAAATAG         |
| GTTTCAATCCACGGCCCGCAGGGGGCGGAC      | AAGGCCAAATOGACCACATCGACGGCGCGGTCT         |
| GTTTCAATCCACGGCCCGCAGGGGGCGGAC      | GTGATGTGCGTTCCGGCAGCAGCGCTCAAAAA          |
| GTTTCAATCCACGGCCCGCAGGGGGCGGAC      | CTGCATCCACGGCAGTTCAGGGGAGGATTCCGTTAT      |
| GTTTCAATCCACGGCTCCCGCAGGGGGCGGAC    | GGTGTCACTTACGGTGTGTTTTTGTATCGGAATCGA      |
| <b>TTCATCCACGGCCCGCAGGGGGCGGTAC</b> | <b>CATTGAATACTACAAGATGGAACCTCAACTACTC</b> |
| GTTTCAATCCACGGCCCGCAGGGGGCGGAC      | CATGCTTGCATTACCTGATCGAAGCCACCCAA          |
| GTTTCAATCCACGGCCCGCAGGGGGCGGAC      | AAAAAGTGATTGTGATCACACACCTGCCAAGCAT        |
| GTTTCAATCCACGGCCCGCAGGGGGCGGAC      | TCGGATTGACTCTTGCCTAAGTGGGTGATCGGCA        |
| GTTTCAATCCACGGCCCGCAGGGGGCGGAC      | AGTTGTCCAGGCCCTGCACGACCTCAATCAACGG        |
| GTTTCAATCCACGGCCCGCAGGGGGCGGAC      | AGGCTATCCGTATCTGGCTTTACGCTGTGAAGCT        |
| .....                               |                                           |
| GTTTCAATCCACGGCCCGCAGGGGGCGGAC      | GCATGGTCGAGAAAGAGTTGCCTGAATCGGCACCTGT     |
| GTTTCAATCCACGGCCCGCAGGGGGCGGAC      | CAATGCTTCTGTTAAGTTGAGCAAGCGCAATCACTG      |
| GTTTCAATCCACGGCCCGCAGGGGGCGGAC      | CACAGCCCGCCTTATCAGCAGGCGTTGTCGAGGC        |
| GTTTCAATCCACGGCCCGCAGGGGGCGGAC      |                                           |

>Chlorobium phaeobacteroides DSM 266\_NC\_008639\_1625359\_1633049\_114\_gold standard

|                                        |                                           |
|----------------------------------------|-------------------------------------------|
| GTTTCAATCCACGGCCCGCAGGGGGCGGAC         | AGGCTATCCGTATCTGGCTTTACGCTGTGAAGCT        |
| GTTTCAATCCACGGCCCGCAGGGGGCGGAC         | CTGTCAATGATGGCCGATGATTCCCGTAAATAG         |
| GTTTCAATCCACGGCCCGCAGGGGGCGGAC         | AAGGCCAAATOGACCACATCGACGGCGCGGTCT         |
| GTTTCAATCCACGGCCCGCAGGGGGCGGAC         | GTGATGTGCGTTCCGGCAGCAGCGCTCAAAAA          |
| GTTTCAATCCACGGCCCGCAGGGGGCGGAC         | CTGCATCCACGGCAGTTCAGGGGAGGATTCCGTTAT      |
| GTTTCAATCCACGGCTCCCGCAGGGGGCGGAC       | GGTGTCACTTACGGTGTGTTTTTGTATCGGAATCGA      |
| <b>GTTTCAATCCACGGCCCGCAGGGGGCGGTAC</b> | <b>CATTGAATACTACAAGATGGAACCTCAACTACTC</b> |
| GTTTCAATCCACGGCCCGCAGGGGGCGGAC         | CATGCTTGCATTACCTGATCGAAGCCACCCAA          |
| GTTTCAATCCACGGCCCGCAGGGGGCGGAC         | AAAAAGTGATTGTGATCACACACCTGCCAAGCAT        |
| GTTTCAATCCACGGCCCGCAGGGGGCGGAC         | TCGGATTGACTCTTGCCTAAGTGGGTGATCGGCA        |
| GTTTCAATCCACGGCCCGCAGGGGGCGGAC         | AGTTGTCCAGGCCCTGCACGACCTCAATCAACGG        |
| GTTTCAATCCACGGCCCGCAGGGGGCGGAC         | CTCGTATCAAGGATGACAGGTGACGCTAGACATC        |
| GTTTCAATCCACGGCCCGCAGGGGGCGGAC         | AGGCTATCCGTATCTGGCTTTACGCTGTGAAGCT        |
| .....                                  |                                           |
| GTTTCAATCCACGGCCCGCAGGGGGCGGAC         | GCATGGTCGAGAAAGAGTTGCCTGAATCGGCACCTGT     |
| GTTTCAATCCACGGCCCGCAGGGGGCGGAC         | CAATGCTTCTGTTAAGTTGAGCAAGCGCAATCACTG      |
| GTTTCAATCCACGGCCCGCAGGGGGCGGAC         | CACAGCCCGCCTTATCAGCAGGCGTTGTCGAGGC        |
| GTTTCAATCCACGGCCCGCAGGGGGCGGAC         |                                           |

>Frankia sp. CcI3\_NC\_007777\_3904715\_3905896\_16\_our results

|                                             |                                            |
|---------------------------------------------|--------------------------------------------|
| <b>CTTGGGAACCTCGCCGGCGGGCGCCCGGGCTGCT</b>   | <b>CTTCTGGGTCGGATATGGTGCCCTTATCGTGACTC</b> |
| <b>GTTGTGATCTCGCCGCTGCCCTGGGGCAGATCAAGC</b> | <b>GCCCAAGTTCGGCATCTTCGC</b>               |
| GTTGCGATCCTCGCCGAGGGCGGTCCCTGGGGCTGC        | TGGTGGGGAGGTGGGCTGCGCCAGCGTCAGTT           |
| GTTGTGATCCTCGCCGAGGGCGGTCCCTGGGGCTGC        | GACGACCTGGTGCTGATCTGCACCAACGGCACCGCC       |
| GTTGTGATCCTCGCCGAGGGCGGTCCCTGGGGCTGC        | CGTCCGCGGACAGAAAGACCTACACGCCACCACC         |
| GTTGTGATCCTCGCCGAGGGCGGTCCCTGGGGCTGC        | GTGTCCGCTCCCGTAGCTGCTCGTCCGCTGGTT          |
| GTTGTGATCCTCGCCGAGGGCGGTCCCTGGGGCTGC        | CTGGGACACGGCCGGATCCTGCCAGGGCACCGCC         |
| GTTGTGATCCTCGCCGAGGGCGGTCCCTGGGGCTGC        | GATGGTGACGACCTGGTGCTGATCTGCCAACG           |
| GTTGTGATCCTCGCCGAGGGCGGTCCCTGGGGCTGC        | TCGATGGTGGCTGGGCTGGTCAAGCCTTGGAT           |
| GTTGTGATCCTCGCCGAGGGCGGTCCCTGGGGCTGC        | AAGTGCTCGAACATGTGTGACTGCATCCGGGT           |
| GTTGTGATCCTCGCCGAGGGCGGTCCCTGGGGCTGC        | CCCCGGCCGGGCTCACCGCTGCCCGCTGGTCTAT         |
| GTTGTGATCCTCGCCGAGGGCGGTCCCTGGGGCTGC        | TCGGAAACACCAAGCTGTGGAGCCACGGGGTA           |
| GTTGTGATCCTCGCCGAGGGCGGTCCCTGGGGCTGC        | TGCGCCCGGCTATCTGGTCCGCTTTCTCGGGA           |
| GTTGTGATCCTCGCCGAGGGCGGTCCCTGGGGCTGC        | GACCGCTGCTGAGCCGACGGTCAACAATGACCC          |
| GTTGTGATCCTCGCCGAGGGCGGTCCCTGGGGCTGC        | CCGCTCCGGCCTGGATGCCAGATGCCGCCCTTGG         |
| GTTGTGATCCTCGCCGAGGGCGGTCCCTGGGGCTGC        | CTGTAGGGGACGTTGTAATGCTTCCGGCCGGAG          |

>Frankia sp. CcI3\_NC\_007777\_3904716\_3905896\_15\_gold standard

|                                      |                                           |
|--------------------------------------|-------------------------------------------|
| CTTGGGAACCTCGCCGGCGGGCGCCCGGGCTGCT   | <b>TCTTGGGTCGGATATGGTGCCCTTATCGTGACTC</b> |
| GTTGCGATCCTCGCCGAGGGCGGTCCCTGGGGCTGC | TGGTGGGGAGGTGGGCTGCGCCAGCGTCAGTT          |
| GTTGTGATCCTCGCCGAGGGCGGTCCCTGGGGCTGC | GACGACCTGGTGCTGATCTGCACCAACGGCACCGCC      |
| GTTGTGATCCTCGCCGAGGGCGGTCCCTGGGGCTGC | CGTCCGCGGACAGCAAGACCTACACGCCACCACC        |
| GTTGTGATCCTCGCCGAGGGCGGTCCCTGGGGCTGC | GTGTCCGCTCCCGTAGCTGCTCGTCCGCTGGTT         |
| GTTGTGATCCTCGCCGAGGGCGGTCCCTGGGGCTGC | CTGGGACACGGCCGGATCCTGCCAGGGCAACGGCC       |
| GTTGTGATCCTCGCCGAGGGCGGTCCCTGGGGCTGC | GATGGTGACGACCTGGTGCTGATCTGCCAACG          |
| GTTGTGATCCTCGCCGAGGGCGGTCCCTGGGGCTGC | TCGATGGTGGCTGGGCTGGTCAAGCCTTGGAT          |
| GTTGTGATCCTCGCCGAGGGCGGTCCCTGGGGCTGC | AAGTGCTCGAACATGTGTGACTGCATCCGGGT          |
| GTTGTGATCCTCGCCGAGGGCGGTCCCTGGGGCTGC | CCCCGGCCGGGCTCACCGCTGCCCGCTGGTCTAT        |
| GTTGTGATCCTCGCCGAGGGCGGTCCCTGGGGCTGC | TCGGAAACACCAAGCTGGTGGAGCCACGGGGTA         |
| GTTGTGATCCTCGCCGAGGGCGGTCCCTGGGGCTGC | GACCGCCCGGCTATCTGGTCCGCTTTCTCGGGA         |
| GTTGTGATCCTCGCCGAGGGCGGTCCCTGGGGCTGC | GCGCGCTGCTGAGCCGACGGTCAACAATGACCC         |
| GTTGTGATCCTCGCCGAGGGCGGTCCCTGGGGCTGC | CCGCTCCGGCCTGGATGCCAGATGCCGCCCTTGG        |
| GTTGTGATCCTCGCCGAGGGCGGTCCCTGGGGCTGC | CTGTAGGGGACGTTGTAATGCTTCCGGCCGGAG         |



## Figure S5. 59 cases with DRs broken by a transposon

(a) CRISPRs with DRs inserted by transposons in the *Microcystis aeruginosa* NIES-843. DRs and spacers are represented in the left and right columns, respectively. The newly annotated CRISPR regions are in red, and the new spacers are marked by yellow background. The last number in the CRISPR name is the DR copy number. (b)~(k) The other CRISPRs with DRs inserted by transposons.

|                                                                                                                                                      |                                                                                                                                              |                                                                                                                                                                      |
|------------------------------------------------------------------------------------------------------------------------------------------------------|----------------------------------------------------------------------------------------------------------------------------------------------|----------------------------------------------------------------------------------------------------------------------------------------------------------------------|
| GTTCCAATTAATCTTAAACCTATTAGGGATTGAAAC<br>.....<br>GTTCCAATTAATCTTAAACCTATTAGGGATTGAAAC<br>GTTCCAATTAATCTTAAACCTATT                                    | TTCAGAATTCGACACAATTATTGCTATAAAAAATGATAGC<br>TTGTAATTGAGCTTCGTGTACGCCAATTTAATC<br><b>MITE(180bp)</b>                                          | <i>Microcystis aeruginosa</i> NIES-843_NC_010296_2814769_2822874_112_our results                                                                                     |
| <b>CTATTAGGGATTGAAAC</b><br>GTTCCAATTAATCTTAAACCTATTAGGGATTGAAAC<br>.....<br>GTTCCAATTAATCTTAAACCTATTAGGGATTGAAAC<br>GTTCCAATTAATCTTAAACCTATTAGGGA   | <b>TCCTGCTTGGTAAATTAAGTACGCCATAAGC</b><br>CAGCCCGAATGGTACGAGACAGCCTGGCAGACCAA<br><b>transposase (513bp)-transposase (675bp)-MITE(167bp)</b>  | <i>Microcystis aeruginosa</i> NIES-843_NC_010296_2823052_2824590_21_our results<br><i>Microcystis aeruginosa</i> NIES-843_NC_010296_2823103_2824595_20_gold standard |
| <b>TTAGGGATTGAAAC</b><br>GTTCCAATTAATCTTAAACCTATTAGGGATTGAAAC<br>.....<br>GTTCCAATTAATCTTAAACCTATTAGGGATTGAAAC<br>GTTCCAATTAATCTTAAACCTATTAGGGATTGAA | <b>AGCAATATTTTGGCATCGGATTCGGTCAAACT</b><br>CTTAAGCAGTGCCTTTGAGCGATAAGGCGATTATC<br><b>transposase (513bp)-transposase (675bp)-MITE(167bp)</b> | <i>Microcystis aeruginosa</i> NIES-843_NC_010296_2826180_2829164_41_our results<br><i>Microcystis aeruginosa</i> NIES-843_NC_010296_2826228_2829166_40_gold standard |

GGGACTTAGGCATTTTCGGGCAGCAAAAAAGGCTCAAACCATTACGGGACAAGGGTTAACCTCGATTATGATTTTCCTTGATCTATCTGGGTTTCAGCGATTTTG  
GGCTCTCGAAGTAAATCCCAAGCAGGGATTGG GGTGAGGCTTTTCTCGATTTGTTTTGTCGTAAGTCCCA (180bp, appears 19 times)

TTGTTACTCGAAAAAGCTCGAAGTATAAGAGTTTGTGCTGCCTATTTTCGAAAAATAGGTTGTAATGGGAGACTCTTTGTTTCCTAGACAAAAATAATTACT  
TTTCAAAAAACACTTTTCTATTTTTTTGTTGGGTA TTTTATTCTCTGGAAGTCCCT(167bp, appears 8 times)

|                                                                                                                                          |                                                                                                                                                                                                                  |                                                                                                                                                                      |
|------------------------------------------------------------------------------------------------------------------------------------------|------------------------------------------------------------------------------------------------------------------------------------------------------------------------------------------------------------------|----------------------------------------------------------------------------------------------------------------------------------------------------------------------|
| CACTATTTTCAGGATAGGTAGGCTAAAA<br>GTTTCAATTCCTCATTAGGTAGGCTAAAAAC<br>.....<br>GTTTCAATTCCTCATTAGGTAGGCTAAAAAC<br><b>GTTTCAATTCCTCATTAG</b> | <b>Transposase (1080bp)- Transposase (426bp)</b><br>AAACGAGGTAGGATCAAGCGGGTGTATCTGCGCTGATAA<br>CCCAATCCGAAATAGAGGTAGGAGAAATGCAGGAGT<br><b>CATCATTGAGCGGATTTTGGATCTCGGTTTATTTA</b><br><b>Transposase (1221bp)</b> | <i>Thermoanaerobacter italicus</i> Ab9_NC_013921_2330986_2331339_5_our results<br><i>Thermoanaerobacter italicus</i> Ab9_NC_013921_2330986_2331286_4_gold standard   |
| ATAGGTAGGCTAAAAAC<br>GTTTCAATTCCTCATTAGGTAGGCTAAAAAC<br>.....<br>GTTTCAATTCCTCATTAGGTAGGCTAAAAAC<br>GTTTCAATTCCTCATTAGGTAGGCTAAAAAC      | CCCGCTTGACATGATATATTTTCGGCGAGGCGCGGT<br>GAAGATGCAATAGAGTAGCAGATAAAATGCTGAA<br>TCTTTCCTATTCTGTTTAACTACTATAGAATAAT                                                                                                 | <i>Thermoanaerobacter italicus</i> Ab9_NC_013921_2332916_2334204_19_our results<br><i>Thermoanaerobacter italicus</i> Ab9_NC_013921_2332916_2334204_19_gold standard |

|                                                                                                                                                                                                                |                                                                                                                                                                    |                                                                                                                                                                                                                                                                                                                                                                                          |
|----------------------------------------------------------------------------------------------------------------------------------------------------------------------------------------------------------------|--------------------------------------------------------------------------------------------------------------------------------------------------------------------|------------------------------------------------------------------------------------------------------------------------------------------------------------------------------------------------------------------------------------------------------------------------------------------------------------------------------------------------------------------------------------------|
| GTCAGAAGGACTTCCTGATGAAGAAGGATTAAAGC<br>.....<br>GTCAGAAGGACTTCCTGATGAAGAAGGATTAAAGC<br>GTCAGAAGGACTTCCTGATGAAGAAGGATTAAAGC<br><b>GATGAAGAAGGATTAAAGC</b>                                                       | GCCGCGCGCTCTTGTGCGCGCATGTACTG<br>GGCTGGCCCGCTCCATGGCATCCATGTCACGGC<br><b>IS66 (927bp)-phage DNA methylase (641bp)</b><br><b>CTTCATCAGAAATGGCGCTCGTGCATCGGTGGG</b>  | <i>Thioalkalivibrio nitratireducens</i> DSM 14787_NC_019902_1466441_1467521_15_our results<br><i>Thioalkalivibrio nitratireducens</i> DSM 14787_NC_019902_1466441_1467533_15_gold standard<br><i>Thioalkalivibrio nitratireducens</i> DSM 14787_NC_019902_1469911_1471052_16_our results<br><i>Thioalkalivibrio nitratireducens</i> DSM 14787_NC_019902_1469966_1471052_15_gold standard |
| TTTCTGAGCTGCCTGCGCGGCAGCGAAC<br>.....<br>TTTCTGAGCTGCCTGCGCGGCAGCGAAC<br>TTTCTGAGCTGCCTGCGCGGCAGCGAAC<br><b>CGCGGCAGCGAAC</b>                                                                                  | CAGGGATAGGTGATGGTTCTATTACGGTTATG<br>ATCATCGAGAAGCCGCAAGTGGCAGCCA<br><b>ISPsy4 (222bp)- istB(171bp)</b><br><b>CCCTCAGATATCGCGCGGCGTGTGATCTGGAT</b>                  | <i>Thioalkalivibrio nitratireducens</i> DSM 14787_NC_019902_2520192_2523887_61_our results<br><i>Thioalkalivibrio nitratireducens</i> DSM 14787_NC_019902_2520192_2523887_61_gold standard<br><i>Thioalkalivibrio nitratireducens</i> DSM 14787_NC_019902_2928156_2928605_7_our results<br><i>Thioalkalivibrio nitratireducens</i> DSM 14787_NC_019902_2928217_2928605_6_gold standard   |
| TTTCTGAGCTGCCTGCGCGGCAGCGAAC<br>.....<br>TTTCTGAGCTGCCTGCGCGGCAGCGAAC<br>TTTCTGAGCTGCCTGCGCGGCAGCGAAC<br>TTTCTGAGCTGCCTGCGCGGCAGCGAAC<br>.....<br>TTTCTGAGCTGCCTGCGCGGCAGCGAAC<br>TTTCTGAGCTGCCTGCGCGGCAGCGAAC | CTGGCCCAAGCCGACGACCCCGGCTGCTACGA<br><b>IS110(1383bp)</b><br>GGCGGCAGTCCGGTGGTCCGATTTTGGATGA<br>GCTGGCGGGAACCTCATGAGCATGGCTGGCGA<br>GGGGCGATCAGTCCGGGGTTCGAGGGATCGA | <i>Thioalkalivibrio nitratireducens</i> DSM 14787_NC_019902_2931057_2932046_16_our results<br><i>Thioalkalivibrio nitratireducens</i> DSM 14787_NC_019902_2931057_2932046_16_gold standard                                                                                                                                                                                               |

|                                                                             |                                                                                  |                                                                                     |
|-----------------------------------------------------------------------------|----------------------------------------------------------------------------------|-------------------------------------------------------------------------------------|
| GTTTCAATTCCTCATAGGTACGCTGAGAAC<br>.....                                     | GCATTGCCTTTCATCTCCCTCGGCATGCCCGC                                                 | <i>Thermacetogenium phaeum</i> DSM 12270_NC_018870_2439391_2440133_11_our results   |
| GTTTCAATTCCTCATAGGTACGCTGATAAC<br>GTTTCAATTCCTCATAG                         | GCTCTGGATGCTTGGAGAAAATGCAAGGAACGGAATA<br>IS110 (2800bp)                          | <i>Thermacetogenium phaeum</i> DSM 12270_NC_018870_2439391_2440146_11_gold standard |
| AGGTACGCTGAGAAC<br>GTTTCAATTCCTCATAGGTACGCTGAGAAC<br>.....                  | ACATAATATTCCTTGTATGCATAAACCACGCCGTCAGGA<br>TCTGCACATTGGGGCATAAAGCGACGCCCCAAAAACC | <i>Thermacetogenium phaeum</i> DSM 12270_NC_018870_2443573_2445992_36_our results   |
| GTTTCAATTCCTCATAGGTACGCTGAAAAAC<br>GTTTCAATTCCTCATA                         | TTCTCGGCTGGCAGGCTGATTTAGAGGAGGTGTTCTAA<br>IS1634(1701bp)                         | <i>Thermacetogenium phaeum</i> DSM 12270_NC_018870_2443641_2446006_35_gold standard |
| TCATAGGTACGCTGAAAAAC<br>GTTTCAATTCCTCATAGGTACGCTGAAAAAC<br>.....            | CGGTAGATAGTCCCGACGAGGCTCTT<br>CGATAATGTTCAAACTTGCATTCAATTCGTTCT                  | <i>Thermacetogenium phaeum</i> DSM 12270_NC_018870_2447892_2448160_4_our results    |
| GTTTCAATTCCTCATAGGTACGCTGAAAAAC<br>GTTTCAATTCCTCATAG                        | GAAATATACCATGCGGGGTGTTTCAGTCCGGTTCA<br>IS110 (1215bp)                            | <i>Thermacetogenium phaeum</i> DSM 12270_NC_018870_2447944_2448173_3_gold standard  |
| AGGTACGCTGAAAAAC<br>GTTTCAATTCCTCATAGGTACGCTGAAAAAC<br>.....                | TAAAACCTGATTCCTCCAGTCTTTTCTTTGGGCA<br>ACGGAACCACTCCTGCCAATATGCTCTTTTCGTTTC       | <i>Thermacetogenium phaeum</i> DSM 12270_NC_018870_2449719_2451060_20_our results   |
| GTTTCAATTCCTCATAGGTACGCTGAAAAAC<br>GTTTCAATTCCTCATAGGTACGCTGAAAAAC<br>..... | CCCGGACAATACCCATCATGATACCGTCTCGGTTCTTC                                           | <i>Thermacetogenium phaeum</i> DSM 12270_NC_018870_2449704_2451060_20_gold standard |
| GTTTCAATTCCTCATAGGTACGCTGAAAAAC<br>.....                                    | TTTGACCACCCTCATCTTAGCAAATGCTAACGGA                                               | <i>Thermacetogenium phaeum</i> DSM 12270_NC_018870_2453564_2455390_27_our results   |
| GTTTCAATTCCTCATAGGTACGCTGAAAAAC<br>GTTTCAATTCCTCATAG                        | ACATTTTCAATTTTATGTAGATTGAAATATCGTTCG<br>MITE (300bp)                             | <i>Thermacetogenium phaeum</i> DSM 12270_NC_018870_2453564_2455337_26_gold standard |
| AGGTACGCTGAAAAAC<br>GTTTCAATTCCTCATAGGTACGCTGAAAAAC<br>.....                | CGGTGTGTGATGTATGAAAAGATGACGATGACCAGGGC<br>ATGTGCCGAGGTGTGCCGAATGCGCAGATATCC      | <i>Thermacetogenium phaeum</i> DSM 12270_NC_018870_2455691_2458143_37_our results   |
| GTTTCAATTCCTCATAGGTACGCTGAAAAAC<br>GTTTCAATTCCTCATA                         | GCATGGACTGTGAGCGGATGTACGTCTCTGGGAGTA<br>IS1634(1701bp)                           | <i>Thermacetogenium phaeum</i> DSM 12270_NC_018870_2455676_2458157_37_gold standard |
| TCATAGGTACGCTGAAAAAC<br>GTTTCAATTCCTCATAGGTACGCTGAAAAAC<br>.....            | GCCGAGAAAATGTTCTCGGTGCGCTGGGATTACGCT<br>GATGCCCTCCTTCTTGCGATTGAACGGCAAGAAGTG     | <i>Thermacetogenium phaeum</i> DSM 12270_NC_018870_2460043_2463456_51_our results   |
| GTTTCAATTCCTCATAGGTACGCTGAAAAAC<br>GTTTCAATTCCTCATAG                        | CGGACCCTTCAACCCAGGAGGTTTGTGACCTG<br>MITE (300bp)                                 | <i>Thermacetogenium phaeum</i> DSM 12270_NC_018870_2460106_2463402_49_gold standard |
| AGGTACGCTGAAAAAC<br>GTTTCAATTCCTCATAGGTACGCTGAAAAAC<br>.....                | GACTGGCAGAGATTCGGGATGTCGTGAGGCAGTATC                                             | <i>Thermacetogenium phaeum</i> DSM 12270_NC_018870_2463757_2464503_11_our results   |
| GTTTCAATTCCTCATAGGTACGCTGAAAAAC<br>GTTTCAATTCCTCATAGGTACGCTGAAAAAC          | GAGGGAGAATGCCGATGGTCGGTCGAGTCCGCGG                                               | <i>Thermacetogenium phaeum</i> DSM 12270_NC_018870_2463742_2464503_11_gold standard |

|                                                                                                                                                                                      |                                                                                                                                                    |                                                                                                                                                                         |
|--------------------------------------------------------------------------------------------------------------------------------------------------------------------------------------|----------------------------------------------------------------------------------------------------------------------------------------------------|-------------------------------------------------------------------------------------------------------------------------------------------------------------------------|
| GTCGTAATCCCTTCAA<br>AAATCAGGTCATTAATTCCAAT<br>GTCGTAATCCCTTCAAATCAGGTCATTAATTCCAAT<br>.....<br>GTCGTAATCCCTTCAAATCAGGTCATTAATTCCAAT<br>GTCGTAATCCCTTCAAATCAGGTCATTAATTCCAAT<br>..... | <b>MITE(49bp)</b><br><b>TGAAGATTAAAGACCGAAGCAATCCAGATTTTGAAGA</b><br>CATAGGCTGATTAAGGGCATGTAAGCATGGAGCTTGT<br>GGAAGGGCAACAACCCTTCCGGAGGTTTTAAAATGA | <i>Flexistipes sinusarabici</i> DSM 4947_NC_015672_1428433_1430685_30_ourresults<br><i>Flexistipes sinusarabici</i> DSM 4947_NC_015672_1428495_1430685_29_gold standard |
| GTCGTAATCCCTTCAA<br>AAATCAGGTCATTAATTCCAAT<br>GTCGTAATCCCTTCAAATCAGGTCATTAATTCCAAT<br>GTCGTAATCCCTTCAAATCAGGTCATTAATTCCAAT<br>.....                                                  | <b>IS4 (1368bp)</b><br><b>MITE(49bp)</b><br><b>AGTATATCTTAACTTAAACAATGGATTAGAAGACTTTT</b><br>TCGGGTGCTGCGTATTATGCAACTGCTCCACGGAAAGG                | <i>Flexistipes sinusarabici</i> DSM 4947_NC_015672_1709402_1709566_2_ourresults<br><i>Flexistipes sinusarabici</i> DSM 4947_NC_015672_1709462_1709573_1_gold standard   |
| GTTGTAATCCCTTCAA<br>AAATCAGGTCATGGATTCCAAT<br>GTCGTAATCCCTTCAAATCAGGTCATTAATTCCAAT<br>.....<br>GTCGTAATCCCTTCAAATCAGGTCATTAATTCCAAT<br>GTCGTAATCCCTTCAAATCAGGTCATTAATTCCAAT<br>..... | <b>MITE(47bp)</b><br>GGTATAGATAATAAAAAATGTCATGATTTGATATA<br>AATAAATACTCAAGAACCTTTTGAATGAGATAGAA<br>AAATTCGGACTGAGCAATTAGGATGGCAAAAAA               | <i>Flexistipes sinusarabici</i> DSM 4947_NC_015672_1709819_1710226_5_ourresults<br><i>Flexistipes sinusarabici</i> DSM 4947_NC_015672_1709819_1710226_5_gold standard   |
| GTTGTAATCCCTTCAA<br>AAATCAGGTCATGGATTCCAAT<br>GTCGTAATCCCTTCAAATCAGGTCATTAATTCCAAT<br>.....<br>GTCGTAATCCCTTCAAATCAGGTCATTAATTCCAAT<br>GTCGTAATCCCTTCAAATCAGGTCATTAATTCCAAT<br>..... | <b>MITE(47bp)</b><br>GTTGAAGCACTCGGCGCAGTTCTATCTTTGAGCAGA<br>AGAGAGATTTCTCCATTTCCATAATTAATACAGTTGAT<br>TACACAATAAAACAGATACTTGTATTGCTTTTCTTA        | <i>Flexistipes sinusarabici</i> DSM 4947_NC_015672_1710472_1710885_5_ourresults<br><i>Flexistipes sinusarabici</i> DSM 4947_NC_015672_1710472_1710885_5_gold standard   |
| GTTGTAATCCCTTCAA<br>AAATCAGGTCATGGATTCCAAT<br>GTCGTAATCCCTTCAAATCAGGTCATTAATTCCAAT<br>.....<br>GTCGTAATCCCTTCAAATCAGGTCATTAATTCCAAT<br>GTCGTAATCCCTTCAAATCAGGTCATTAATTCCAAT<br>..... | <b>MITE(47bp)</b><br>CTGAAGCGAATCAATTATATAAAAAATCTTTCTCTTCT<br>AGTGATCGGGGTGGTACGTCGTTGATATCGAAA<br>GCCGGAAGGAGCACAACTTCGGAGGTTACAAAA              | <i>Flexistipes sinusarabici</i> DSM 4947_NC_015672_1711131_1712652_20_ourresults<br><i>Flexistipes sinusarabici</i> DSM 4947_NC_015672_1711131_1712652_20_gold standard |
| GTTGTAATCCCTTCAA<br>AAATCAGGTCATGAATCCAAT<br>GTCGTAATCCCTTCAAATCAGGTCATTAATTCCAAT<br>.....<br>GCAATCCCTTCAAATCAGGTCATGAATCCAAT<br>GTCGTAATCCCTTCAAATCAGGTCATTAATTCCAAT               | <b>MITE(47bp)</b><br>TGGAAATATATAGATACCTGTCTTCCGGGTTGA<br>TTAAAAAGAAATCCAAAGAAAATAGAGAACTCCCAAG<br>ATCTTCGTCCTCGTGGGATATCCCGAGGACTGAAAAA           | <i>Flexistipes sinusarabici</i> DSM 4947_NC_015672_1734298_1735756_19_ourresults<br><i>Flexistipes sinusarabici</i> DSM 4947_NC_015672_1734298_1735756_19_gold standard |

ACATTGCGCAATATCTCATCGCAAATGTTTCTGTTCAGAGCTTGCTGG (49bp, appears 3 times )

ACCCAGCCATCATATAATCGGCTGGGTTCTGTGTCGAGCTTGCTGG (47bp, appears 4 times )

|                                                                                                                            |                                                                                                                                                                                        |                                                                                                                                                                  |
|----------------------------------------------------------------------------------------------------------------------------|----------------------------------------------------------------------------------------------------------------------------------------------------------------------------------------|------------------------------------------------------------------------------------------------------------------------------------------------------------------|
| GTTTCAATTACCGTAGGTACTACAGAAC<br>TTTCAAAGCCTTAAAGGTACTATCAGAAC<br>.....                                                     | <b>TCATATAGGTGCATTCCTTCATTCGCATAATCGCAAA</b><br>TTGGACAAGCTAAAGCTAGGGCTTTACGGCGCATCCTA                                                                                                 | <i>Thermobacillus compostii</i> KWC4_NC_019897_3270701_3271073_5_our results                                                                                     |
| GTTTCAATTCCTTATAGGTACTACAGAAC<br>TTCAATTCCTTATAGGTACTATCAGAAC<br>GTTTCAATTCCTCATAGGTACGATCAAAAC<br>.....                   | CGATACGGGCGATGTCATAGTATACTTCGCCAGATGAGA<br><b>IS110(1105bp)</b><br>TTCACACTTCGGCATGTCGGCCCTCGGACTTACGAC                                                                                | <i>Thermobacillus compostii</i> KWC4_NC_019897_3270768_3271074_4_gold standard                                                                                   |
| GTTTCAATTCCTCATAGGTACGATCAAAAC<br><b>GTTTCAATTCCTCATAG</b><br>ATAGGTACGATCAAAAC<br>GTTTCAATTCCTCATAGGTACGATCAAAAC<br>..... | <b>TATAGTGCTCGGGTCAAGGACCGGAAATATACCGG</b><br><b>IS110(1227bp)</b><br>GGAGCCTAAACCATGCGTCAATATCGGGACGAAT<br>GAGCAGCCGGGCGCCAAATCCGATGCACAGACGAG                                        | <i>Thermobacillus compostii</i> KWC4_NC_019897_3272406_3273774_20_our results<br><i>Thermobacillus compostii</i> KWC4_NC_019897_3272406_3273720_19_gold standard |
| GTTTCAATTCCTCATAGGTACGATCAAAAC<br><b>GTTTCAATTCCTCATAG</b><br>ATAGGTACGATCAAAAC<br>GTTTCAATTCCTCATAGGTACGATCAAAAC<br>..... | <b>ACTCTGCGAGCGCTCGAGGCGCCAGCCGACTTT</b><br><b>IS110(1227bp)</b><br>CATCAGCGCGCCGACACCGGCCACGTCGACACCG<br>GCAAACGGAAACCGCTGCGCGCCGCCCGTGTTTGT                                          | <i>Thermobacillus compostii</i> KWC4_NC_019897_3275324_3277594_34_our results<br><i>Thermobacillus compostii</i> KWC4_NC_019897_3275311_3277541_33_gold standard |
| GTTTCAATTCCTCATAGGTACGATCAAAAC<br><b>GTTTCAATTCCTCATAG</b><br>ATAGGTACGATCAAAAC<br>GTTTCAATTCCTCATAGGTACGATCAAAAC<br>..... | <b>CGGGACGATCTATGTCATGTTCTCCGGCGTGAAGT</b><br><b>IS110(1227bp)</b><br>AAAGGAATGGGACAGACATCGTCTTCCTGAAATTA<br>CATGTCGAGCTCCACCATGAGAGCCGATCCGCCGCGC                                     | <i>Thermobacillus compostii</i> KWC4_NC_019897_3279144_3280208_16_our results<br><i>Thermobacillus compostii</i> KWC4_NC_019897_3279131_3280155_15_gold standard |
| GTTTCAATTCCTCATAGGTACGATCAAAAC<br><b>GTTTCAATTCCTCATAG</b><br>ATAGGTACGATCAAAAC<br>GTTTCAATTCCTCATAGGTACGATCAAAAC<br>..... | <b>CTGTATCGTATATTCAGTTCCTGATCCTCGGAAGCAIT</b><br><b>IS110(1228bp)</b><br>GTTACGGGTGTGCTCCACTAGCCGCTCCACGCTTC<br>GTGATACTGTCCGAATACTCGTACCGTCATATCCGT                                   | <i>Thermobacillus compostii</i> KWC4_NC_019897_3281758_3283032_19_our results<br><i>Thermobacillus compostii</i> KWC4_NC_019897_3281745_3282977_18_gold standard |
| GTTTCAATTCCTCATAGGTACGATCAAAAC<br>.....                                                                                    | GTGAGCCATCAGAAATATCTCGTTCCTATCCGT<br><b>IS(1293bp)-IS(1278bp)-IS110(1224bp)</b><br>GATCGAAAAGCGAGAAACGATTGAGTTGAACGTTGACGA<br>GAAGGAGTTTACCCTCGCCGTCATACCGCTGGAGT                      | <i>Thermobacillus compostii</i> KWC4_NC_019897_3284583_3285001_6_our results<br><i>Thermobacillus compostii</i> KWC4_NC_019897_3284570_3285001_6_gold standard   |
| GTTTCAATTCCTCATAGGTACGATCAAAAC<br>.....                                                                                    | <b>TGAGGTGGTGTGAATTATAGAAGCTGAAAACAGG</b><br><b>IS110(1227bp)</b><br>AAACCTACATCCGATGGACTACACTGGTACAGATCGCTAC<br>GATGCCCTGAAGTTCCAGACGGCTGATACGCCA                                     | <i>Thermobacillus compostii</i> KWC4_NC_019897_3298570_3299110_8_our results<br><i>Thermobacillus compostii</i> KWC4_NC_019897_3298557_3299057_7_gold standard   |
| GTTTCAATTCCTCATAGGTACGATCAAAAC<br><b>GTTTCAATTCCTCATAG</b><br>ATAGGTAAGATCAA<br>GTTTCAATTCCTCATAGGTACGATCAAAAC<br>.....    | <b>TCAGTTTGGCCATGTATGTGATCTTCGGCATTTCGT</b><br><b>IS110(1225bp)</b><br>ACCGATGCCGAGAACAATGGAGTAAGAATCCGTATG<br>TTTGATGTACATGGCAGCGCGGAACAGAGATCG<br>GGCCACGATCTCACCCACGCTGTCGTACCGGTGT | <i>Thermobacillus compostii</i> KWC4_NC_019897_3300646_3300996_5_our results<br><i>Thermobacillus compostii</i> KWC4_NC_019897_3300647_3300943_4_gold standard   |
| GTTTCAATTCCTCATAGGTACGATCAAAAC<br><b>GTTTCAATTCCTCATAG</b><br>ATAGGTACGATCAAAAC<br>GTTTCAATTCCTCATAGGTACGATCAAAAC<br>..... |                                                                                                                                                                                        | <i>Thermobacillus compostii</i> KWC4_NC_019897_3302548_3302761_3_our results<br><i>Thermobacillus compostii</i> KWC4_NC_019897_3302535_3302761_3_gold standard   |

|                                                                               |                                                                                                                                                   |                                                                                                                                                                                                    |
|-------------------------------------------------------------------------------|---------------------------------------------------------------------------------------------------------------------------------------------------|----------------------------------------------------------------------------------------------------------------------------------------------------------------------------------------------------|
| GTTTTAGCCTACCTATAAGGAATTGAAAC<br>.....                                        | AGCTGAAAAGACATTTTAAAGTAGCAGGGCAAGGTACAG<br><b>IS110(1221bp)</b>                                                                                   | <i>Thermoanaerobacter brockii</i> subsp. finnijii Ako-1_NC_014964_121660_124897_48_our results<br><i>Thermoanaerobacter brockii</i> subsp. finnijii Ako-1_NC_014964_121660_124897_48_gold standard |
| GTTTTAGCCTACCTATAAGGAATTGAAAC<br>GTTTTAGCCTACCTAT<br><b>CTATAAGGAATTGAAAC</b> | AGTATTAATAATTAAGGAGTAAATAATGAAAAA<br><b>CTAATTTGCTTTAAGCTTGTTCACAAAGATAGACCTTG</b><br>CGCCGAGGTCCTCTCTGTCGATATAATGCGACAGG                         | <i>Thermoanaerobacter brockii</i> subsp. finnijii Ako-1_NC_014964_126473_128016_23_our results<br><i>Thermoanaerobacter brockii</i> subsp. finnijii Ako-1_NC_014964_126529_128029_22_gold standard |
| GTTTTAGCCTACCTATAAGGAATTGAAAC<br>GTTTTAGCCTACCTAT<br><b>CTATAAGGAATTGAAAC</b> | AGAGGAACAATGGAATGATGAAATAGGACAAAAGA<br><b>AGGTCAAAACCTGGGGCAAGACTTACGACGGGAAA</b><br>TGCCATCACTATCATATCTCCATCCACTCTTA                             | <i>Thermoanaerobacter brockii</i> subsp. finnijii Ako-1_NC_014964_131265_133542_34_our results<br><i>Thermoanaerobacter brockii</i> subsp. finnijii Ako-1_NC_014964_131317_133555_33_gold standard |
| GTTTTAGCCTACCTATAAGGAATTGAAAC<br>GTTTTAGCCTACCTAT<br><b>CTATAAGGAATTGAAAC</b> | TGGATAGCAAAGGCAAGTGCAGAACTGGAATAAAAAA<br><b>IS110(1221bp)</b><br><b>CCTATCAGCTCCGGTGGCAGCCAAAGCAATAGC</b><br>GATAGCCTTCAGTATTAACCTTGCCGCTTCCAAATG | <i>Thermoanaerobacter brockii</i> subsp. finnijii Ako-1_NC_014964_135132_136869_26_our results<br><i>Thermoanaerobacter brockii</i> subsp. finnijii Ako-1_NC_014964_135184_136882_25_gold standard |
| GTTTTAGCCTACCTATAAGGAATTGAAAC<br>GTTTTAGCCTACCTAT                             | CCATGTGTGTTTTACGCTCAATCTCGTTACGTAGAAA<br><b>IS110(1221bp)</b>                                                                                     |                                                                                                                                                                                                    |

|                                                                                     |                                                                                                   |                                                                                                  |
|-------------------------------------------------------------------------------------|---------------------------------------------------------------------------------------------------|--------------------------------------------------------------------------------------------------|
| GTTTTAGCCTACCTATAAGGAATTGAAAC<br>.....                                              | AGCTGAAAGACATTTTAAAGTAGCAGGGCAAGGTACAG                                                            | <i>Thermoanaerobacter pseudethanolicus</i> ATCC 33223_ _NC_010321_121655_124879_48_our results   |
| GTTTTAGCCTACCTATAAGGAATTGAAAC<br>GTTTTAGCCTACCTAT<br>CTATAAGGAATTGAAAC              | AGTATTAATAAATAAGGAGGTTTAAAAATGGAAAA<br>IS110 (1221bp)<br>CTAATTGGCTTTAAGCTTGTGTGCTACAAGATAGACCTTG | <i>Thermoanaerobacter pseudethanolicus</i> ATCC 33223_ _NC_010321_121655_124892_48_gold standard |
| GTTTTAGCCTACCTATAAGGAATTGAAAC<br>.....                                              | CGCCGAGGTCTTCTCTGTCGGATATAATGCGACAGG                                                              | <i>Thermoanaerobacter pseudethanolicus</i> ATCC 33223_ _NC_010321_126469_128012_23_our results   |
| GTTTTAGCCTACCTATAAGGAATTGAAAC<br>GTTTTAGCCTACCTAT<br>CTATAAGGAATTGAAAC              | AGAGGAACAATTGGAATGTATGAAATAGGACAAAGA<br>IS110 (1221bp) - IS110 (1221bp)                           | <i>Thermoanaerobacter pseudethanolicus</i> ATCC 33223_ _NC_010321_126525_128025_22_gold standard |
| GTTTTAGCCTACCTATAAGGAATTGAAAC<br>.....                                              | AGGTCAAAACCTGGGGCAAAGACTTACGACGGGAAA<br>TGCCATCAACCTATCATACTATCTCCATCCACTCTTA                     | <i>Thermoanaerobacter pseudethanolicus</i> ATCC 33223_ _NC_010321_131261_134422_47_our results   |
| GTTTTAGCCTACCTATAAGGAATTGAAAC<br>GTTTTAGCCTACCTATAAGGAATTGAAAC<br>CTATAAGGAATTGAAAC | CACTTACGGCAGTCCGGTAGCTCCTGATCATGTTCGG<br>MITE (309bp)<br>GTTTTTGTACATTTCACATCAAGGATTTTTCTAT       | <i>Thermoanaerobacter pseudethanolicus</i> ATCC 33223_ _NC_010321_131313_134493_47_gold standard |
| GTTTTAGCCTACCTATAAGGAATTGAAAC<br>.....                                              | TGCCGTCTGTGCTTGCAGTATTTCTAGTCGCGGA                                                                | <i>Thermoanaerobacter pseudethanolicus</i> ATCC 33223_ _NC_010321_134731_135597_13_our results   |
| GTTTTAGCCTACCTATAAGGAATTGAAAC<br>GTTTTAGCCTACCTAT<br>CTATAAGGAATTGAAAC              | CCGCCACATACATCCAAACAGGAAGTACCAGCATGG<br>IS110 (1221bp)<br>AGAAGAATATTGACAGTTTAACTGCTCAAAGATAGC    | <i>Thermoanaerobacter pseudethanolicus</i> ATCC 33223_ _NC_010321_134784_135610_12_gold standard |
| GTTTTAGCCTACCTATAAGGAATTGAAAC<br>.....                                              | ACTGTCCCTCAATTTCCCTGTTTTCTCCCTTAAAGCTT                                                            | <i>Thermoanaerobacter pseudethanolicus</i> ATCC 33223_ _NC_010321_137187_138123_14_our results   |
| GTTTTAGCCTACCTATAAGGAATTGAAAC<br>GTTTTAGCCTACCTAT<br>CTATAAGGAATTGAAAC              | TGGATAGCAAAGGCAAGTGCAGAACTGGATAAAAGA<br>IS110 (1221bp)<br>CCTATCAGCTCCGGTGGCACCCAAACGCATAGC       | <i>Thermoanaerobacter pseudethanolicus</i> ATCC 33223_ _NC_010321_137241_138136_13_gold standard |
| GTTTTAGCCTACCTATAAGGAATTGAAAC<br>.....                                              | GATAGCCTTCAGCTATTAACTTTCGCGCTTCAATTTG                                                             | <i>Thermoanaerobacter pseudethanolicus</i> ATCC 33223_ _NC_010321_139713_141450_26_our results   |
| GTTTTAGCCTACCTATAAGGAATTGAAAC<br>GTTTTAGCCTACCTAT                                   | CCATGTTGGTTTTACGCTCAATCTCGGTTACGTAGAAA<br>IS110 (1221bp)                                          | <i>Thermoanaerobacter pseudethanolicus</i> ATCC 33223_ _NC_010321_139765_141463_25_gold standard |

|                                                                                              |                                                                                                |                                                                                                      |
|----------------------------------------------------------------------------------------------|------------------------------------------------------------------------------------------------|------------------------------------------------------------------------------------------------------|
| GTCTTATCTGAACTATGAGGGATGTAAC<br>.....                                                        | ATAGAGGTACCAGGACAAGCTTGGCTCGAAGGAGAAG                                                          | <i>Caldicellulosinuptor saccharolyticus</i> DSM 8903_ _NC_009437_ _344075_347921_58_our results      |
| GTCTTATCTGAACTATGAGGGATGTAAC<br>GTCTTATCTGAACTATGAGGGATGTAAC<br>GTCTTATCTGAACTATGAGGGATGTAAC | CTTTTCAGTTCAAATAATATCTCGTTCGCAAGGAAA<br>ATPase (792bp)-IS (1230bp)-IS (1071bp)                 | <i>Caldicellulosinuptor saccharolyticus</i> DSM 8903_ _NC_009437_ _344075_347921_58_gold standard    |
| GTCTTATCTGAACTATGAGGGATGTAAC<br>.....                                                        | CITTTTCTTTTTCAAAGACCTTGCACAAAAAATC                                                             | <i>Caldicellulosinuptor saccharolyticus</i> DSM 8903_ _NC_009437_ _351757_353150_21_our results      |
| GTCTTATCTGAACTATGAGGGATGTAAC<br>GTCTTATCTGAACTATGAG                                          | CATAGAAAGCGGACTTTTTATTACTGGAAGGATGAAG<br>IS (909bp)-IS (1230bp)-IS (438bp)                     | <i>Caldicellulosinuptor saccharolyticus</i> DSM 8903_ _NC_009437_ _351757_353160_21_gold standard    |
| GTCTTATCTGAACTATGAGGGATGTAAC<br>.....                                                        | ACAAAAAATGCAAGGTCTTTGGAACAAATATTGATGA                                                          | <i>Caldicellulosinuptor saccharolyticus</i> DSM 8903_ _NC_009437_ _356437_357973_23_our results      |
| GTCTTATCTGAACTATGAGGGATGTAAC<br>.....                                                        | TCAACTTTTCGGTTCTCTTTCAGCTTGTTTGACTGC                                                           | <i>Caldicellulosinuptor saccharolyticus</i> DSM 8903_ _NC_009437_ _356504_357983_22_gold standard    |
| GTCTTATCTGAACTATGAGGGATGTAAC<br>GTCTTATCTGAACTATGAG                                          | ATTTCCAATGTTGCACATATAGGCAAAATATCCGCTGCTA<br>IS (1248bp)-IS (486bp)                             | <i>Caldicellulosinuptor saccharolyticus</i> DSM 8903_ _NC_009437_ _539664_541402_26_our results      |
| GTCTTATCTGAACTATGAGGGATGTAAC<br>.....                                                        | IS (987bp)-IS (1230bp)-IS (321bp)<br>ACATGTTTGGGCTCCCGATTTAGAGCCGATTGAGCCG                     | <i>Caldicellulosinuptor saccharolyticus</i> DSM 8903_ _NC_009437_ _539731_541402_25_gold standard    |
| GTCTTATCTGAACTATGAGGGATGTAAC<br>.....                                                        | TTGCATAACTAGTGGATCAATTAATCGGCTCTATAATA                                                         | <i>Caldicellulosinuptor saccharolyticus</i> DSM 8903_ _NC_009437_ _2513322_2520034_102_our results   |
| GTCTTATCTGAACTATGAGGGATGTAAC<br>GTTTTATCTAACTATGAGGGATGTAAC<br>.....                         | AAGGGGGTGTGGAAAACTACTATTGCACCTGCAC<br>IS (1131bp) - IS (1221bp)                                | <i>Caldicellulosinuptor saccharolyticus</i> DSM 8903_ _NC_009437_ _2513322_2519967_101_gold standard |
| GTTTACATCCCTCATAGTTCAGATAAGAC<br>.....                                                       | TAAAGTTATTAATCCTCTTTCAGCCACTTGTGCTA<br>AGCTTTTTGGAACGACTAATCCAGATAGCCCTTATCA<br>IS110 (1287bp) | <i>Caldicellulosinuptor saccharolyticus</i> DSM 8903_ _NC_009437_ _2522005_2524601_39_our results    |
| GTTTACATCCCTCATAGTTCAGATAAGAC<br>.....                                                       | TATCAACATTGAACCAAAGCTGTTATGTTGGTCATCA<br>TAACGCAGACACGGCAACAAAAGAAAAGCGTTGATAA                 | <i>Caldicellulosinuptor saccharolyticus</i> DSM 8903_ _NC_009437_ _2521995_2524601_39_gold standard  |
| GTTTACATCCCTCATAGTTCAGATAAGAC<br>GTTTACATCCTTATAGTTCAGATAAGAC                                | TGATGATTATTACCAACAACATACAGATATAAAAA                                                            |                                                                                                      |

|                                                                                                                                                                                                                                                                                                                                                                                                                                                                                                                                                                                                  |                                                                                                                                                                                                                                                                                                                                                                                                                                                                                                                                                              |                                                                                                                                                                                                                                                                                                                                                                                                                                                                                                                                                                                                                                                          |
|--------------------------------------------------------------------------------------------------------------------------------------------------------------------------------------------------------------------------------------------------------------------------------------------------------------------------------------------------------------------------------------------------------------------------------------------------------------------------------------------------------------------------------------------------------------------------------------------------|--------------------------------------------------------------------------------------------------------------------------------------------------------------------------------------------------------------------------------------------------------------------------------------------------------------------------------------------------------------------------------------------------------------------------------------------------------------------------------------------------------------------------------------------------------------|----------------------------------------------------------------------------------------------------------------------------------------------------------------------------------------------------------------------------------------------------------------------------------------------------------------------------------------------------------------------------------------------------------------------------------------------------------------------------------------------------------------------------------------------------------------------------------------------------------------------------------------------------------|
| ATAGGTAGGCTAAAAAC<br>TTTCAATCCCTTATAGGTAAGCTAAAAAC<br>.....<br>GTTTCAATCCCTTATAGGTAAGCTAAAAAC<br>GTTTCAATCCCTTATAGGTAAGCTAAAAAC<br>ATAGGTAGGCTAAAAAC<br>GTTTCAATCCCTTATAGGTAAGCTAAAAAC<br>.....<br>GTTTCAATCCCTTATAGGTAAGCTAAAAAC<br>GTTTCAATCCCTTATAGGTAAGCTAAAAAC<br>.....<br>GTTTCAATCCCTTATAGGTAAGCTAAAAAC<br>GTTTCAATCCCTTATAGGTAAGCTAAAAAC<br>.....<br>GTTTCAATCCCTTATAGGTAAGCTAAAAAC<br>GTTTCAATCCCTTATAGGTAAGCTAAAAAC<br>.....<br>GTTTCAATCCCTTATAGGTAAGCTAAAAAC<br>GTTTCAATCCCTTATAGGTAAGCTAAAAAC<br>.....<br>GTTTCAATCCCTTATAGGTAAGCTAAAAAC<br>GTTTCAATCCCTTATAGGTAAGCTAAAAAC<br>..... | GAGCATTACCGCTTGTAAAAGTATTGTATCTAATTTAA<br>AAATTTTTGCAGGGGAGAGACATAAAACGAAATGAA<br><br>CCACTCCGCCCCAAATTCAAAACCTCATTTTTCCTT<br>IS110 (1220bp)<br>TAGAGAGGGTAAAAGCGGCATGCCAAGTTTGTAAA<br>TTAAAGGAGGAAAGATAAAAATGATAACTTCTGTAAA<br><br>GAAAACCTAACCCGACCGCATGCGGGGAGATAAAAAA<br>IS110 (1221bp)<br>AATGAAATTCAAATCTCAACAGTAAAGATTTGGC<br>CACATACAGGACATCCACACCCGCTCCGATAACT<br><br>AACCAAACCTTGAAAAAGCTGCATTTTCAAGTTTA<br>IS110 (1221bp)<br>CTTTTCTGACCACCAAAAACCTATGTGGCTGTTCTG<br>GATTCTACTGCATTATACATCTGTGCTACATCA<br><br>TTTAAAATCGTATAAAGAGCTTATTGAGCTGATTT | <i>Thermoanaerobacter</i> sp. X513_NC_014538_2149198_2149615_6_ourresults<br><i>Thermoanaerobacter</i> sp. X513_NC_014538_2149254_2149615_5_gold standard<br><i>Thermoanaerobacter</i> sp. X513_NC_014538_2340512_2341253_11_ourresults<br><i>Thermoanaerobacter</i> sp. X513_NC_014538_2340499_2341198_10_gold standard<br><i>Thermoanaerobacter</i> sp. X513_NC_014538_2342843_2347020_63_ourresults<br><i>Thermoanaerobacter</i> sp. X513_NC_014538_2342830_2346967_62_gold standard<br><i>Thermoanaerobacter</i> sp. X513_NC_014538_2348597_2362246_205_ourresults<br><i>Thermoanaerobacter</i> sp. X513_NC_014538_2348597_2362246_205_gold standard |
| GTTTTAGCTTACCTATAAGGGATTGAAAC<br>.....<br>GTTTTAGCTTACCTATAAGGGATTGAAAC<br>GTTTTAGCCTACCTAT<br>ATAGGTAGGCTAAAAAC<br>GTTTCAATCCCTTATAGGTAAGCTAAAAAC<br>.....<br>GTTTCAATCCCTTATAGGTAAGCTAAAAAC<br>GTTTCAATCCCTTATAGGTAAGCTAAAAAC<br>.....<br>GTTTCAATCCCTTATAGGTAAGCTAAAAAC<br>GTTTCAATCCCTTATAGGTAAGCTAAAAAC<br>.....<br>GTTTCAATCCCTTATAGGTAAGCTAAAAAC<br>GTTTCAATCCCTTATAGGTAAGCTAAAAAC<br>.....<br>GTTTCAATCCCTTATAGGTAAGCTAAAAAC<br>GTTTCAATCCCTTATAGGTAAGCTAAAAAC<br>.....<br>GTTTCAATCCCTTATAGGTAAGCTAAAAAC<br>GTTTCAATCCCTTATAGGTAAGCTAAAAAC<br>.....                                     | AAGGAAAAATGAGTTTTGAAATTTGGCGGGAGTGG<br><br>TTAAAATTAGATACAAAATACCTTTTACAAGCGGTAATGCTG<br>IS110 (1220bp)<br>TAGAGAGGGTAAAAGCGGCATGGCAAGTTTGTAAA<br>TTAAAGGAGGAAAGATAAAAATGATAACTTCTGTAAA<br><br>GAAAACCTAACCCGACCGCATGCGGGGAGATAAAAAA<br>IS110 (1221bp)<br>AATGAAATTCAAATCTCAACAGTAAAGATTTGGC<br>CACATACAGGACATCCACACCCGCTCCGATAACT<br><br>AACCAAACCTTGAAAAAGCTGCATTTTCAAGTTTA<br>IS110 (1221bp)<br>CTTTTCTGACCACCAAAAACCTATGTGGCTGTTCTG<br>GATTCTACTGCATTATTACATCTGTGCTACATCA<br><br>TTTAAAATCGTATAAAGAGCTTATTGAGCTGATTT                                     | <i>Thermoanaerobacter</i> sp. X514_NC_010320_764967_765384_6_ourresults<br><i>Thermoanaerobacter</i> sp. X514_NC_010320_764967_765328_5_gold standard<br><i>Thermoanaerobacter</i> sp. X514_NC_010320_2340417_2341158_11_ourresults<br><i>Thermoanaerobacter</i> sp. X514_NC_010320_2340404_2341103_10_gold standard<br><i>Thermoanaerobacter</i> sp. X514_NC_010320_2342748_2346925_63_ourresults<br><i>Thermoanaerobacter</i> sp. X514_NC_010320_2342735_2346872_62_gold standard<br><i>Thermoanaerobacter</i> sp. X514_NC_010320_2348515_2363082_219_ourresults<br><i>Thermoanaerobacter</i> sp. X514_NC_010320_2348502_2363082_219_gold standard     |

|                                                 | CRISPR                                                                                                                                    | DR                                   | CRISPR                              |
|-------------------------------------------------|-------------------------------------------------------------------------------------------------------------------------------------------|--------------------------------------|-------------------------------------|
|                                                 |                                                                                                                                           | GTTCCGTCGCCCTCTCGGGGTTTTGGGTCTGACGAC |                                     |
| Mycobacterium africanum GM041182                | CRISPR_30_GTTTCCGTCGCCCTCTCGGGGTT-IS6110(1355bp)-GGGTTTTGGGTCTGACGAC_CRISPR_29                                                            |                                      | CRISPR_29-IS6110(1355bp)- CRISPR_29 |
| Mycobacterium bovis AF2122/97                   | CRISPR_17_GTTTCCGTCGCCCTCTCGGGGTT-IS6110(1355bp)-GGGTTTTGGGTCTGACGAC_CRISPR_24                                                            |                                      | CRISPR_16-IS6110(1355bp)- CRISPR_24 |
| Mycobacterium bovis BCG str. Korea 1168P        | CRISPR_19_GTTTCCGTCGCCCTCTCGGGGTT-IS6110(1355bp)-GGGTTTTGGGTCTGACGAC_CRISPR_29                                                            |                                      | CRISPR_18-IS6110(1355bp)- CRISPR_29 |
| Mycobacterium bovis BCG str. Mexico             | CRISPR_19_GTTTCCGTCGCCCTCTCGGGGTT-IS6110(1355bp)-GGGTTTTGGGTCTGACGAC_CRISPR_29                                                            |                                      | CRISPR_18-IS6110(1355bp)- CRISPR_29 |
| Mycobacterium bovis BCG str. Pasteur 1173P2     | CRISPR_19_GTTTCCGTCGCCCTCTCGGGGTT-IS6110(1355bp)-GGGTTTTGGGTCTGACGAC_CRISPR_29                                                            |                                      | CRISPR_18-IS6110(1355bp)- CRISPR_29 |
| Mycobacterium bovis BCG str. Tokyo 172          | CRISPR_19_GTTTCCGTCGCCCTCTCGGGGTT-IS6110(1355bp)-GGGTTTTGGGTCTGACGAC_CRISPR_29                                                            |                                      | CRISPR_18-IS6110(1355bp)- CRISPR_29 |
| Mycobacterium tuberculosis CAS/NITR204          | CRISPR_18_GTTTCCGTCGCCCTCTCGGGGTT-IS6110(1355bp)-GGGTTTTGGGTCTGACGAC_CRISPR_23                                                            |                                      | CRISPR_17-IS6110(1355bp)- CRISPR_23 |
| Mycobacterium tuberculosis CDC1551              | CRISPR_19_GTTTCCGTCGCCCTCTCGGGGTT-IS6110(1355bp)-GGGTTTTGGGTCTGACGAC_CRISPR_15                                                            |                                      | CRISPR_18-IS6110(1355bp)- CRISPR_15 |
| Mycobacterium tuberculosis EAI5                 | CRISPR_18_GTTTCCGTCGCCCTCTCGGGGTT-IS6110(1355bp)-GGGTTTTGGGTCTGACGAC_CRISPR_23                                                            |                                      | CRISPR_17-IS6110(1355bp)- CRISPR_23 |
| Mycobacterium tuberculosis EAI5/NITR206         | CRISPR_18_GTTTCCGTCGCCCTCTCGGGGTT-IS6110(1355bp)-GGGTTTTGGGTCTGACGAC_CRISPR_23                                                            |                                      | CRISPR_17-IS6110(1355bp)- CRISPR_23 |
| Mycobacterium tuberculosis str. Haarlem/NITR202 | CRISPR_18_GTTTCCGTCGCCCTCTCGGGGTT-IS6110(1355bp)-GGGTTTTGGGTCTGACGAC_CRISPR_23                                                            |                                      | CRISPR_17-IS6110(1355bp)- CRISPR_23 |
| Mycobacterium tuberculosis H37Ra                | CRISPR_18_GTTTCCGTCGCCCTCTCGGGGTT-IS6110(1355bp)-GGGTTTTGGGTCTGACGAC_CRISPR_23                                                            |                                      | CRISPR_17-IS6110(1355bp)- CRISPR_23 |
| Mycobacterium tuberculosis H37Rv                | CRISPR_18_GTTTCCGTCGCCCTCTCGGGGTT-IS6110(1355bp)-GGGTTTTGGGTCTGACGAC_CRISPR_23                                                            |                                      | CRISPR_17-IS6110(1355bp)- CRISPR_23 |
| Mycobacterium tuberculosis str. Beijing/NITR203 | CRISPR_17_GTTTCCGTCGCCCTCTCGGGGTTTTGGG-IS6110(1355bp)-GGGTTTTGGGTCTGACGAC_CRISPR_23                                                       |                                      | CRISPR_17-IS6110(1355bp)- CRISPR_22 |
| Mycobacterium canettii CIPT 140060008           | ISL3(2846bp)-GGTITTTGGGTCTGACGAC_CRISPR_26                                                                                                |                                      | ISL3(2846bp)- CRISPR_25             |
| Mycobacterium tuberculosis F11                  | CRISPR_18_GTTTCCGTCGCCCTCTCGGGGTT-IS6110(1355bp)- CRISPR_18                                                                               |                                      | CRISPR_17-IS6110(1355bp)- CRISPR_18 |
| Mycobacterium tuberculosis KZN 1435             | CRISPR_17_GTTTCCGTCGCCCTCTCGGGGTT-IS6110(1355bp)- CRISPR_21                                                                               |                                      | CRISPR_16-IS6110(1355bp)- CRISPR_21 |
| Mycobacterium tuberculosis KZN 4207             | CRISPR_17_GTTTCCGTCGCCCTCTCGGGGTT-IS6110(1355bp)- CRISPR_21                                                                               |                                      | CRISPR_16-IS6110(1355bp)- CRISPR_21 |
| Mycobacterium tuberculosis KZN 605              | CRISPR_17_GTTTCCGTCGCCCTCTCGGGGTT-IS6110(1355bp)- CRISPR_21                                                                               |                                      | CRISPR_16-IS6110(1355bp)- CRISPR_21 |
| Mycobacterium tuberculosis CDC5079              | CRISPR_15_GTTTCCGTCGCCCTCTC-IS6110(1355bp)                                                                                                |                                      | CRISPR_14-IS6110(1355bp)            |
| Mycobacterium tuberculosis CDC5180              | CRISPR_15_GTTTCCGTCGCCCTCTC-IS6110(1355bp)                                                                                                |                                      | CRISPR_14-IS6110(1355bp)            |
| Mycobacterium tuberculosis CTRI-2               | CRISPR_18_GTTTCCGTCGCCCTCTCGGGGTT-IS6110(1355bp)-CRISPR_6_GTTTCCGTCGCCCTCTC-IS6110(1355bp)-CTCGGGTTTTGGGTCTGACGAC-CRISPR_15               |                                      | CRISPR_17-IS6110(1355bp)- CRISPR_5- |
| Mycobacterium tuberculosis str. Haarlem         | CRISPR_11_GTTTCCGTCGCCCTCTCGGGGTTTTGGGTCTGAC-IS6110(1355bp)-CRISPR_6_GTTTCCGTCGCCCTCTCGGGGTT-IS6110(1355bp)-GGGTTTTGGGTCTGACGAC-CRISPR_24 |                                      | CRISPR_11-IS6110(1355bp)- CRISPR_5- |
| Mycobacterium tuberculosis str. Beijing/NITR203 | CRISPR_17_GTTTCCGTCGCCCTCTCGGGGTTTTGGG-IS6110(1355bp)-GGGTTTTGGGTCTGACGAC-CRISPR_23                                                       |                                      | CRISPR_17-IS6110(1355bp)- CRISPR_22 |

**Figure S6. 15 CRISPRs broken by undetected DRs inside**

(a)~(g) CRISPRs with undetected DRs inside. The two neighboring CRISPRs have almost identical DRs and one undetected DR in between. The undetected DR may be a full copy. The regions of new DRs matched to the existing DRs are in red. The regions of new spacers are marked by yellow background. The last number in the CRISPR name is the DR copy number.

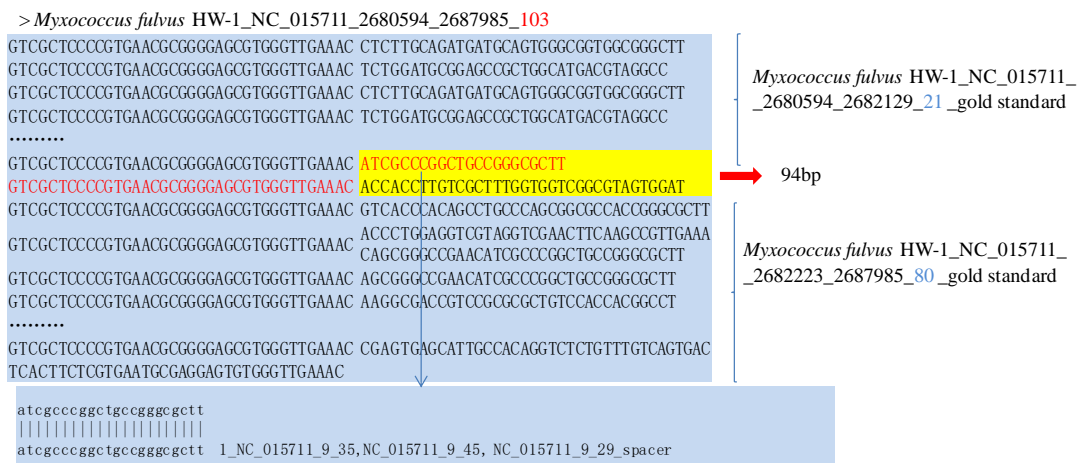

> *Caldicellulosiruptor obsidiansis* OB47\_NC\_014392\_145343\_158051\_193

|                              |                                       |                                                                                          |
|------------------------------|---------------------------------------|------------------------------------------------------------------------------------------|
| GTTTTATCTGAACTATGAGGGATGTAAC | TCTTTTCTCTTTAACAAATCTTGATATGCCAACTCT  | } <i>Caldicellulosiruptor obsidiansis</i> OB47_NC_014392_145343_157028_177_gold standard |
| GTTTTATCTGAACTATGAGGGATGTAAC | AACGACAAGCTAACGTACAGGAAAAATCCCATGACG  |                                                                                          |
| GTTTTATCTGAACTATGAGGGATGTAAC | GTTCAATTCTGATTATATCAGACTTAAAGTCCGTTG  |                                                                                          |
| GTTTTATCTGAACTATGAGGGATGTAAC | TCAGTAGAATTTTAAAAGATTATTTGACTTTAGGTGG |                                                                                          |
| .....                        |                                       |                                                                                          |
| GTTTTATCTGAACTATGAGGGATGTAAC | TCAATGGCTAAAG                         | } 80bp                                                                                   |
| GTTTTATCTGAACTATGAGGGATGTAAC | TCAAAATTTACAACAGACATTTTCTCTCTTCTCTC   |                                                                                          |
| GTTTTATCTGAACTATGAGGGATGTAAC | GCACAAAACTGTGGACTACACTTTTAAATCATTAAAG | } <i>Caldicellulosiruptor obsidiansis</i> OB47_NC_014392_157108_158061_14_gold standard  |
| GTTTTATCTGAACTATAAGGGATGTAAC | GATACTATCGAATGCACAAATAAAAACTATTTTA    |                                                                                          |
| GTTTTATCTGAACTATGAGGGATGTAAC | TTGAGAATAAGGATAATCTAACGAAGGGTAACACCA  |                                                                                          |
| GTTTTATCTGAACTATGAGGGATGTAAC | TCTCTACAGGAAATAATTTCATTAATTAATTCATAAA |                                                                                          |
| .....                        |                                       |                                                                                          |
| GTTTTATCTGAACTATGAGGGATGTAAC | TTTATAGATGATTTTTTCATAGTACAGATATGCAACA |                                                                                          |
| GTTTTATCTGAACTATGAG          |                                       |                                                                                          |

> *Thermosiphon africanus* TCF52B\_NC\_011653\_309784\_311878\_30

|                                |                                           |                                                                                 |
|--------------------------------|-------------------------------------------|---------------------------------------------------------------------------------|
| GTTTAGAATCTACCTATGAGGAATGAAAAC | CATATTTTTAGATAAAAATACACGCATTAAGTCCCCCA    | } <i>Thermosiphon africanus</i> TCF52B_NC_011653_309784_310512_10_gold standard |
| GTTTAGAATCTACCTATGAGGAATGAAAAC | TTGAATTCCTCGACACCCCTCCTTAAAGATTTTCATTT    |                                                                                 |
| GTTTAGAATCTACCTATGAGGAATGAAAAC | TATACTTCTCTATGTGTCATTAATAGCAATATCTCGTG    |                                                                                 |
| GTTTAGAATCTACCTATGAGGAATGAAAAC | ATTCAAATCTTCTTTAACATAATAACACCTCCATACATTT  |                                                                                 |
| .....                          |                                           |                                                                                 |
| GTTTAGAATCTACCTATGAGGAATGAAAAC | TAAATCAGT                                 | } 81bp                                                                          |
| GTTTAGAATCTACCTATGAGGAATGAAAAC | ATCCCGATGTCGCGGCTTCTCTACTATCTGTATGGATTTT  |                                                                                 |
| GTTTAGAATCTACCTATGAGGAATGAAAAC | TTCATTTTGTATTATACATTTCAATTTCCCTTTTAA      | } <i>Thermosiphon africanus</i> TCF52B_NC_011653_310593_311880_18_gold standard |
| GTTTAGAATCTACCTATGAGGAATGAAAAC | ATCACAGAATAATCTGTGTGTCGATCGCCACTATTTAAATC |                                                                                 |
| GTTTAGAATCTACCTATGAGGAATGAAAAC | GTGAATAAGTGTTTCTTCAAATTTTCAAGACTAATGGTTTC |                                                                                 |
| GTTTAGAATCTACCTATGAGGAATGAAAAC | CAAAAATGGCACTTGCAACACTTCTCCTTTAGTTTCTCA   |                                                                                 |
| .....                          |                                           |                                                                                 |
| GTTTAGAATCTACCTATGAGGAATGAAAAC | GTACGAACTGTCTCAATTTGCAACGGGATAATGT        |                                                                                 |
| GTTTAGAATCTACCTATGAGGAATGAAA   |                                           |                                                                                 |

> *Herpetosiphon aurantiacus* ATCC 23779\_NC\_009973\_102032\_109407\_101

|                                       |                                                    |                                                                                        |
|---------------------------------------|----------------------------------------------------|----------------------------------------------------------------------------------------|
| ATTTCAATFACTCGATCCGATTAGAGGATACTGAAAC | TACGGATGAGGCTGCACCTGCGCTCAGGAGCCGCC                | } <i>Herpetosiphon aurantiacus</i> ATCC 23779_NC_009973_102032_108752_92_gold standard |
| ATTTCAATFACTCGATCCGATTAGAGGATACTGAAAC | GTTGAAGGGATTCATGTTTATATTCACCCGCGCT                 |                                                                                        |
| ATTTCAATFACTCGATCCGATTAGAGGATACTGAAAC | ACGCATCGATCCGATCATGGATCGCCACAACTGGT                |                                                                                        |
| ATTTCAATFACTCGATCCGATTAGAGGATACTGAAAC | AAACCTTTTATAGCTCGGCGCACTATGGCATGAT                 |                                                                                        |
| .....                                 |                                                    |                                                                                        |
| ATTTCAATFACTCGATCCGATTAGAGGATACTGAAAC | TCGCGCACTTGGCCAACTTGGGCATTTGGACAAACGT              | } 112bp                                                                                |
| ATTTCAATFACTCGATCCGATTAGAGGATACTGAAAC | TATCCAAATAACATTTGCCTATATTTGCATCGCACATC             |                                                                                        |
| ATTTCAATFACTCGATCCGATTAGAGGATACTGAAAC | TTAGAGGATACTGAAACATTCATCCATGGTTGCCAGAACCTGGGGCATAG | } <i>Herpetosiphon aurantiacus</i> ATCC 23779_NC_009973_108864_109408_7_gold standard  |
| ATTTCAATFACTCGATCCGATTAGAGGATACTGAAAC | TCGATCACGTTGTACGGGCAACGCTTGGCATTAG                 |                                                                                        |
| ATTTCAATFACTCGATCCGATTAGAGGATACTGAAAC | AGCAGCTTCATGGCGCTGCGGGTGTGCAATTCG                  |                                                                                        |
| ATTTCAATFACTCGATCCGATTAGAGGATACTGAAAC | GCCATGCCTCGGCTGTCTCAACAAATGGCTCCAT                 |                                                                                        |
| .....                                 |                                                    |                                                                                        |
| ATTTCAATFACTCGATCCGATTAGAGGATACTGAAAC | TGCATGGCGTTGAGTTCAGTGGCATCAAGCCAAGGCT              |                                                                                        |
| ATTTCAATFACTCGATCCGCTGGACGAATATTGA    |                                                    |                                                                                        |



> *Salmonella enterica* subsp. *enterica* serovar 4,[5],12:i:- str. 08-1736\_NC\_021820\_4332392\_4333865\_24

|                                                                                                                                                                                                                                                                                                                                                                                                                                                                                                                                                                                                                                                                                                               |                                                                                                                                                                                                                                                                                          |
|---------------------------------------------------------------------------------------------------------------------------------------------------------------------------------------------------------------------------------------------------------------------------------------------------------------------------------------------------------------------------------------------------------------------------------------------------------------------------------------------------------------------------------------------------------------------------------------------------------------------------------------------------------------------------------------------------------------|------------------------------------------------------------------------------------------------------------------------------------------------------------------------------------------------------------------------------------------------------------------------------------------|
| <pre> GTTTATCCCCTGGCGCGGGGAACA TTTTTCAGCCCTGTGCGACTGCGGAACCCCT CGGTTTATCCCCTGGCGCGGGGAACAC GCGAAATAGTGGGAAAAACCCCTGGTTAAC CGGTTTATCCCCTGGCGCGGGGAACAC TAGGCCTTGATACCATCGCTCGCACCTCGTCA CGGTTTATCCCCTGGCGCGGGGAACAC GTTTATTAAGTCTAGTTAAATTAATGGGTTG ..... CGGTTTATCCCCTGGCGCGGGGAACAC GATCGAGTAACGTGGCTGGAACGGG TCGGCGCGGGGAACAC AAAATTAAGCCGAGGGTGGCACCGCCCTATT CGGTTTATCCCCTGGCGCGGGGAACAC GCACCTCGAACCCTTTTAAACACTACCGTTT CGGTTTATCCCCTGGCGCGGGGAACAC TGGACCGATGGGGCAACATCGCGAAGCTGG CGGTTTATCCCCTGGCGCGGGGAACAC GTTACGTTTCGTAATGAAAGCGCGAATAT CGGTTTATCCCCTGGCGCGGGGAACAC CCAGAAAGTGCCTAGTGCCTGATGACGAC ..... CGGTTTATCCCCTGGCGCGGGGAACAC CAGCAGAAAAATTATTACTGCTGTGCTCA CGGTTTATCCCCTGGCGCGGGGAACAC </pre> | <p><i>Salmonella enterica</i> subsp. <i>enterica</i> serovar 4,[5],12:i:- str. 08-1736_NC_021820_4332390_4332968_9_gold standard</p> <p>→ 75bp</p> <p><i>Salmonella enterica</i> subsp. <i>enterica</i> serovar 4,[5],12:i:- str. 08-1736_NC_021820_4333042_4333865_13_gold standard</p> |
| <pre> gatcgagtaacgtg-gctggaacg       gatcgagtaacgtg-gctggaacg </pre>                                                                                                                                                                                                                                                                                                                                                                                                                                                                                                                                                                                                                                          | <p><i>Salmonella enterica</i> subsp. <i>enterica</i> serovar Typhimurium str. 798</p> <p>0.962_NC_017046_2_10_spacer</p>                                                                                                                                                                 |

- > *Salmonella enterica* subsp. *enterica* serovar Heidelberg str. 41578\_NC\_021810\_6276\_7936\_27
- > *Salmonella enterica* subsp. *enterica* serovar Heidelberg str. B182\_NC\_017623\_3740803\_3742463\_27
- > *Salmonella enterica* subsp. *enterica* serovar Heidelberg str. SL476\_NC\_011083\_3051219\_3052879\_27
- > *Salmonella enterica* subsp. *enterica* serovar Typhimurium str. 14028S\_NC\_016856\_3096850\_3098323\_24
- > *Salmonella enterica* subsp. *enterica* serovar Typhimurium str. D23580\_NC\_016854\_3069600\_3071012\_23
- > *Salmonella enterica* subsp. *enterica* serovar Heidelberg str. CFSAN002069\_NC\_021812\_3668815\_3670469\_26
- > *Salmonella enterica* subsp. *enterica* serovar Typhimurium var. 5\_str. CFSAN001921-NC\_021814\_490784\_492562\_28
- > *Salmonella typhimurium* LT2\_NC\_003197\_3076613\_3078147\_25

> *Mycobacterium tuberculosis* RGTB423\_NC\_017528\_3115972\_3117672\_23

|                                                                                                                                                                                                                                                                                                                                                                                                                                                                                                                                                                                                                                                                                                                                                                                                                                                                   |                                                                                                                                                                                                       |
|-------------------------------------------------------------------------------------------------------------------------------------------------------------------------------------------------------------------------------------------------------------------------------------------------------------------------------------------------------------------------------------------------------------------------------------------------------------------------------------------------------------------------------------------------------------------------------------------------------------------------------------------------------------------------------------------------------------------------------------------------------------------------------------------------------------------------------------------------------------------|-------------------------------------------------------------------------------------------------------------------------------------------------------------------------------------------------------|
| <pre> TCAGGGTTTGGGCTGACGAC TCGCGGAGCAGCTCTCACCCAGCAGCGGTGAGGTTGG GTTTCGGTCCCCTCGGGGTTTGGGCTGACGAC ACGGACGAGCTGACCGCATCAGCATGCTGAGCTGAGG GTTTCGGTCCCCTCGGGGTTTGGGCTGACGAC TTGTCTCAAGTGTGCGGTGACACCGCTCCAA GTTTCGGTCCCCTCGGGGTTTGGGCTGACGAC CTCGACGGCCCAAGCCAGTTAGCGCAATCCA ..... GTTTCGGTCCCCTCGGGGTTTGGGCTGACGAC ATGCGAATCCGCTGTCAGCATGGGATCCGAGT GTTTCGGTCCCCTCGGGGTTTGGGCTGACGAC TAGGGCGCCCGCGAGGCTGGGGCGGTTTCACGC GTTTCGGTCCCCTCGGGGTTTGGGCTGACGAC TGACGAC GTTTCGGTCCCCTCGGGGTTTGGGCTGACGAC CAGCGCAGACGCGAGCCCGAGTACTCGCTCTCCTCAG GTTTCGGTCCCCTCGGGGTTTGGGCTGACGAC AGGCTGAAATTAAGCCGGAATGACGACGCAATGGT GTTTCGGTCCCCTCGGGGTTTGGGCTGACGAC CTAAGCCCGTAATCCGCAAGTGTGTCAGAAA GTTTCGGTCCCCTCGGGGTTTGGGCTGACGAC TGATGATTGTCGCGTATGACGTGCTACTGAGGTGTT ..... GTTTCGGTCCCCTCGGGGTTTGGGCTGACGAC GTGCAAGAATCCGGTTCAGTGCACACCGTTTAA GTTTCGGTCCCCTCGGGGTTTGGGCTGACGAC </pre> | <p><i>Mycobacterium tuberculosis</i> RGTB423_NC_017528_3115959_3116942_13_gold standard</p> <p>→ 109bp</p> <p><i>Mycobacterium tuberculosis</i> RGTB423_NC_017528_3117050_3117672_8_gold standard</p> |
| <pre> atcggaatccgctgctcagcacatggga-tccgagt       atcggaatccgctgctcagcacatgggat tccgagt </pre>                                                                                                                                                                                                                                                                                                                                                                                                                                                                                                                                                                                                                                                                                                                                                                     | <p><i>Mycobacterium tuberculosis</i> H37Rv</p> <p>97.1%_NC_000962_6_14_spacer</p> <p><i>Mycobacterium tuberculosis</i> H37Rv</p> <p>94.9%_NC_000962_6-15_spacer</p>                                   |

> *Thermococcus onnurineus* NA1\_NC\_011529\_994458\_997976\_52

|                                                                                                                                                                                                                                                                                                                                                                                                                                                                                                                                                                                                                                                                                                                                                                                                     |                                                                                                                                                                                    |
|-----------------------------------------------------------------------------------------------------------------------------------------------------------------------------------------------------------------------------------------------------------------------------------------------------------------------------------------------------------------------------------------------------------------------------------------------------------------------------------------------------------------------------------------------------------------------------------------------------------------------------------------------------------------------------------------------------------------------------------------------------------------------------------------------------|------------------------------------------------------------------------------------------------------------------------------------------------------------------------------------|
| <pre> TTTCGATTCTCTTAGAATCTTATTGCAAC TAAGAAATGGGCACTAGCTTCGGCGGTTGGAATTTG GTTTCAATTCCTTAGAGTCTTATTGCAAC CTGTGGTGGTTCACCAGAGCTTTGCAACGATTAC TTTCAATTCCTTAGAGTCTTATTGCAAC CCTTGAATCCGATAAGCGGGAGCTACGAGTTTC GTTTCAATTCCTTAGAGTCTTATTGCAAC TTCTTGCCACGGTCGCTTACATCAAGCTACGATGA ..... GTTTCAATTCCTTAGAGTCTTATTGCAAC TCGCTTCGACGGTGGCTTTGTCTCCGGATTCATCATC GTTTCAATTCCTTAGAGTCTTATTGCAAC GAAGTTGGCACTCCAACATGCGCCC GTTTCAATTCCTTAGAGTCTTATTGCAAC CAGATCGCTGCTGGTCTGGTCACTGCGCGTGTCTGC TTTCAATTCCTTAGAGTCTTATTGCAAC CCGGCATCAGGGCTGACACCTACTCAACGACCTCTATG GTTTCAATTCCTTAGAGTCTTATTGCAAC AGGAGGAAGATGCAAGTATCATGTTTATGATAAGAA GTTTCAATTCCTTAGAGTCTTATTGCAAC ACGAATCTATCAACCGAGTCAATGGCCCGAGTTCTA ..... GTTTCAATTCCTTAGAGTCTTATTGCAAC TCCCGTTCACGAGCTGTGGCCGCCGCAATCTG GTTTCAATTCCTTAGAGTCTTATTGCAAC </pre> | <p><i>Thermococcus onnurineus</i> NA1_NC_011529_994457_994969_7_gold standard</p> <p>→ 88bp</p> <p><i>Thermococcus onnurineus</i> NA1_NC_011529_995057_997976_43_gold standard</p> |
|-----------------------------------------------------------------------------------------------------------------------------------------------------------------------------------------------------------------------------------------------------------------------------------------------------------------------------------------------------------------------------------------------------------------------------------------------------------------------------------------------------------------------------------------------------------------------------------------------------------------------------------------------------------------------------------------------------------------------------------------------------------------------------------------------------|------------------------------------------------------------------------------------------------------------------------------------------------------------------------------------|

## Figure S7. 8 CRISPRs broken at the beginning of circular chromosomes

(a) A CRISPR is broken into two at the beginning of a circular chromosome of *Cyanobacterium aponinum* PCC 10605. One more spacer is proposed to combine the two CRISPRs into one longer CRISPR. The added region is highlighted in red. The last number in the CRISPR name is the DR copy number.

(b)~(h) The other CRISPRs are broken into two at the beginning of a circular chromosome.

```
> Cyanobacterium aponinum PCC 10605_NC_019776_4113500_4114099+1_810_19
GTTTCAATCCCTAAGAGGTAATAAAGAGTTTAAAC AAAAGATAAAAAGGAGGTGAGTTAATCCACTFAAAA
GTTTCAATCCCTAAGAGGTAATAAAGAGTTTAAAC GAAAAGTTGCAAGGTTTAAAAGTTGCTTACG
GTTTCAATCCCTAAGAGGTAATAAAGAGTTTAAAC GGGATAGACTTAATAAAGAATTTGAGGGCTTTA
GTTTCAATCCCTAAGAGGTAATAAAGAGTTTAAAC TGGTTAAAGCGGATAAGTATTATTGTTTTATCCCA
.....
GTTTCAATCCCTAAGAGGTAATAAAGAGTTTAAAC AACTTTTTTCATTCAAATCCACATTTGCCATCGTA
GTTTCAATCCCTAAGAGGTAATAAAGAGTTTAAAC AAAAAATTGACCCCCCCCCCGTGAGACTAACGAGACT
GTTTCAATCCCTAAGAGGTAATAAAGAGTTTAAAC AAAACACC AAAATGGGAGTACTT AAGTACAAGCGA
GTTTCAATCCCTAAGAGGTAATAAAGAGTTTAAAC GTTCTAGCCGATATTTCTCGTCAAACCATTCGT
GTTTCAATCCCTAAGAGGTAATAAAGAGTTTAAAC TGACGATGTGATCGGTGAATTGGAAGCTCACATTCAA
GTTTCAATCCCTAAGAGGTAATAAAGAGTTTAAAC TTTGGATTATTGGGATTAGTATTGGGATTGGGAAT
.....
GTTTCAATCCCTAAGAGGTAATAAAGAGTTTAAAC ATCAAAAAGCCAATCAATATCAGTATTAATCTGCA
GTTTCAATCCCTAAGAGGTAATAAAGAGTTTAAAC
```

*Cyanobacterium aponinum* PCC 10605\_NC\_019776\_4113500\_4114042\_7\_gold standard

110bp

*Cyanobacterium aponinum* PCC 10605\_NC\_019776\_54\_810\_10\_gold standard

```
> Thermococcus sp. CL1_NC_018015_1949366_1950313+1_682_24
GTTGCAATAAGACTCTGGGAAATTGAAAC GCGGGCACTTCATCACCAGCCGACCCAATCACCAT
GTTGCAATAAGACTCTGGGAAATTGAAAC CACAGGGTATAAAGTCCGTGCTGATGGCGTGAACGTG
GTTGCAATAAGACTCTGGGAAATTGAAAC GGGCGGGTGTGTTATCTCTATCATCATACGTAGGT
GTTGCAATAAGACTCTGGGAAATTGAAAC GAAACTGAAAAGCTTTAACTGCCCTGCTTTCTGC
.....
GTTGCAATAAGACTCTGGGAAATTGAAAC TAGGGTGGGAAATTGTAATCGACCCGAGTAGGGGGAGAA
GTTGCAATAAGACTCTGGGAAATTGAAAC GTGATATGGCGAAGCCTCTTACT
GTTGCAATAAGACTCTGGGAAATTGAAAC TTGGGGTTTTGAGGTTGGGGAAGTTGCCCAT
GTTGCAATAAGACTCTGGGAAATTGAAAC ATTAGTATCACGGCAGGCTTATCGCCCTGCTACTA
GTTGCAATAAGACTCTGGGAAATTGAAAC TAGAGTATCACTTGCTCCACGCCATTGGCTTAGCCCTCA
GTTGCAATAAGACTCTGGGAAATTGAAAC TAAGCATTTTTGCCTGCTGCTGATGTAGTCTTAA
.....
GTTGCAATAAGACTCTGGGAAATTGAAAG CTTTCTCTGCAAAAGTCGAGCAAGCTTTGAGATACT
GTTGCAATAAGACTCTGGGAAAGAGAAAAG
```

*Thermococcus* sp. CL1\_NC\_018015\_1949366\_1950270\_13\_gold standard

90bp

*Thermococcus* sp. CL1\_NC\_018015\_48\_682\_9\_gold standard

```
> Candidatus Puniceispirillum marinum IMCC1322_NC_014010_2753369_2753527+1_1792_29
AGTATAGCACTCTGGTATTGAGAGCC TAGAGCAACGCTTTCGGTCTCGTGAACCTTTTCGTAGGA
AGTATAGCACTCTGGTATTGAGAGCC TAGAGCAACGCTATAAGTCAACAACAATAATCGATGTTG
AGTATAGCACTCTGGTATTGAGAGCC TAGAGCAAC TGTGAGGTGTTTTGTGAGATAGTGAGCTGC
AGTATAGCACTCTGGTATTGAGAGCC TAGAGCAAC CGTGGTGGTCTCAAGCAGATAAACCCCTTCC
AGTATAGCACTCTGGTATTGAGAGCC TAGAGCAAC TGACCCTTGATATCGCATCACCGCACGGC
AGTATAGCACTCTGGTATTGAGAGCC TAGAGCAAC GTAACGCCATTGTGCCGCAAGTCGCGGGCC
AGTATAGCACTCTGGTATTGAGAGCC TAGAGCAAC ATGAGCAGAATTCATTATCACCTTTGACTT
.....
AGTATAGCACTCTGGTATTGAGAGCC TAGAGCAAC CGATCCCTGATGATGGTTGACCGCCGAA
AGTATAGCACTCTGGTATTGAGAGCC TAGAGCAAC CCCCCCA
```

*Candidatus Puniceispirillum marinum* IMCC1322\_NC\_014010\_2753369\_2753527\_2\_gold standard

39bp

*Candidatus Puniceispirillum marinum* IMCC1322\_NC\_014010\_40\_1792\_26\_gold standard

```
> Thermocrinis albus DSM 14484_NC_013894_1496455_1500577+1_90_62
CTTTCAACTCCACACGGTACATTAGAAAC ACTATCTGAACTTCTCACAGTATGCAAAAACAGCG
CTTTCAACTCCACACGGTACATTAGAAAC TGCTGGACAAGGCACTGGCAAGGATGAGACAAAGAT
CTTTCAACTCCACACGGTACATTAGAAAC TACTTATCAAGCGTTTCCCTGTAGACTTTTTGACGTAG
CTTTCAACTCCACACGGTACATTAGAAAC TATCAATGACTTGAGGGCTGACACCACTTCTTTTTT
.....
CTTTCAACTCCACACGGTACATTAGAAAC TGTAGTCTGTACTTCTTAATAACCTGTTCTATTGATGC
CTTTCAACTCCACACGGTACATTAGAAAC TGTCTGTCAGGTACGAAAGAAACAGTGTATATAGATGATA
CTTTCAACTCCACACGGTACATTAGAAAC TCCAGCTCGGGCTTTCCTCAGTCCCTTGTCTTGC
CTTTCAACTCCACACGGTACATTAGAAAC
```

*Thermocrinis albus* DSM 14484\_NC\_013894\_1496455\_1500535\_60\_gold standard

42bp

*Thermocrinis albus* DSM 14484\_NC\_013894\_1\_90\_1\_gold standard

> *Fervidicoccus fontis* Kam940\_NC\_017461\_1319183\_1319206 +1\_794\_13

|                          |                                         |                                                                                                                                                                                                                                                                                                                                                                                                                                                                                                                                                                                                                                                                                                                                                                                                                                                                                                                                            |
|--------------------------|-----------------------------------------|--------------------------------------------------------------------------------------------------------------------------------------------------------------------------------------------------------------------------------------------------------------------------------------------------------------------------------------------------------------------------------------------------------------------------------------------------------------------------------------------------------------------------------------------------------------------------------------------------------------------------------------------------------------------------------------------------------------------------------------------------------------------------------------------------------------------------------------------------------------------------------------------------------------------------------------------|
| GAATCTCTCAGATAGAATTGAAAG | TCTGAAAAATCATCACAACATCAGCTTTTCCCT       |  60bp<br> 60bp<br> 60bp<br> 60bp<br> 60bp<br> 60bp<br> 60bp<br> 60bp<br> 60bp<br> 60bp |
| GAATCTCTCAGATAGAATTGAAAG | TTGGCATAATTTACTCCCCTTGCTCAGAAATCAAGCATT |                                                                                                                                                                                                                                                                                                                                                                                                                                                                                                                                                                                                                                                                                                                                                                                                                                                                                                                                            |
| GAATCTCTCAGATAGAATTGAAAG | TTGGCATAATTTACTCCCCTTGCTCAGAAATCAAGCATT |                                                                                                                                                                                                                                                                                                                                                                                                                                                                                                                                                                                                                                                                                                                                                                                                                                                                                                                                            |
| GAATCTCTCAGATAGAATTGAAAG | TTCAACAAATTTAGTCACAAATGCGCTAGGAAACAGAA  |                                                                                                                                                                                                                                                                                                                                                                                                                                                                                                                                                                                                                                                                                                                                                                                                                                                                                                                                            |
| GAATCTCTCAGATAGAATTGAAAG | TCAAACCCATGCTTCTTAGTATTCTGCTGCTTCT      |                                                                                                                                                                                                                                                                                                                                                                                                                                                                                                                                                                                                                                                                                                                                                                                                                                                                                                                                            |
| GAATCTCTCAGATAGAATTGAAAG | CTCTTGCTAATGCTCTAGCAGTCGATCATAGTAGGC    |                                                                                                                                                                                                                                                                                                                                                                                                                                                                                                                                                                                                                                                                                                                                                                                                                                                                                                                                            |
| .....                    |                                         |                                                                                                                                                                                                                                                                                                                                                                                                                                                                                                                                                                                                                                                                                                                                                                                                                                                                                                                                            |
| GAATCTCTCAGATAGAATTGAAAG | AACTCTTCCATGTATTAACCAAACCTTCCAAATCCT    |                                                                                                                                                                                                                                                                                                                                                                                                                                                                                                                                                                                                                                                                                                                                                                                                                                                                                                                                            |
| GAATCTCTCAGATAGAATTGAAAG |                                         |                                                                                                                                                                                                                                                                                                                                                                                                                                                                                                                                                                                                                                                                                                                                                                                                                                                                                                                                            |

*Fervidicoccus fontis* Kam940\_NC\_017461\_37\_794\_12\_gold standard

> *Picrophilus torridus* DSM 9790\_NC\_005877\_1540318\_1545895+1\_309\_87

|                                |                                      |                                                                                                                                                                                                                                                                                                                                                                                                                                                                                                                                                                                                                                                                                                                                                                                                                                                                                                                                            |
|--------------------------------|--------------------------------------|--------------------------------------------------------------------------------------------------------------------------------------------------------------------------------------------------------------------------------------------------------------------------------------------------------------------------------------------------------------------------------------------------------------------------------------------------------------------------------------------------------------------------------------------------------------------------------------------------------------------------------------------------------------------------------------------------------------------------------------------------------------------------------------------------------------------------------------------------------------------------------------------------------------------------------------------|
| CTTTCAATCCTATTTAGGTTATTATTAAAC | TCCGCCGAATTTCAAACACTTATAGTAGGACTAGA  |  36bp<br> 36bp<br> 36bp<br> 36bp<br> 36bp<br> 36bp<br> 36bp<br> 36bp<br> 36bp<br> 36bp |
| TTTTCAATCCTATTTAGGTTATTATTAAAC | TATCTCTCTTTTCAATCCTTATCGATTTATCGATCC |                                                                                                                                                                                                                                                                                                                                                                                                                                                                                                                                                                                                                                                                                                                                                                                                                                                                                                                                            |
| CTTTCAATCCTATTTAGGTTATTATTAAAC | CACGGTGGTATGCAACGATAAGATCAACATTATCA  |                                                                                                                                                                                                                                                                                                                                                                                                                                                                                                                                                                                                                                                                                                                                                                                                                                                                                                                                            |
| CTTTCAATCCTATTTAGGTTATTATTAAAC | TCCATCTAAAGACATCTCTCTAAATATATCAAAGCC |                                                                                                                                                                                                                                                                                                                                                                                                                                                                                                                                                                                                                                                                                                                                                                                                                                                                                                                                            |
| .....                          |                                      |                                                                                                                                                                                                                                                                                                                                                                                                                                                                                                                                                                                                                                                                                                                                                                                                                                                                                                                                            |
| CTTTCAATCCTATTTAGGTTATTATTAAAC | TATAATCTGCTTCCCTACATATCTAACAGAACCTCT |                                                                                                                                                                                                                                                                                                                                                                                                                                                                                                                                                                                                                                                                                                                                                                                                                                                                                                                                            |
| CTTTCAATCCTATTTAGGTTATTATTAAAC | CATTGATTTTTCATGAAATCATGAATTCGGATAA   |                                                                                                                                                                                                                                                                                                                                                                                                                                                                                                                                                                                                                                                                                                                                                                                                                                                                                                                                            |
| CTTTCAATCCTATTTAGGTTATTATTAAAC | CTGGATTTCTTGGCCATATTTGCGAGATACTATA   |                                                                                                                                                                                                                                                                                                                                                                                                                                                                                                                                                                                                                                                                                                                                                                                                                                                                                                                                            |
| CTTTCAATCCTATTTAGGTTATTATTAAAC | ATATATCGGATTTCAAACCTTATAGATAGACTAGA  |                                                                                                                                                                                                                                                                                                                                                                                                                                                                                                                                                                                                                                                                                                                                                                                                                                                                                                                                            |
| CTTTCAATCCTATTTAGGTTATTATTAAAC | GCCAGAGGCATTTCTCCGTGGTGGTCTTAAATGA   |                                                                                                                                                                                                                                                                                                                                                                                                                                                                                                                                                                                                                                                                                                                                                                                                                                                                                                                                            |

*Picrophilus torridus* DSM 9790\_NC\_005877\_1540318\_1545873\_82\_gold standard

*Picrophilus torridus* DSM 9790\_NC\_005877\_15\_309\_4\_gold standard

> *Thermococcus litoralis* DSM 5473\_NC\_022084\_2214800\_2215172+1\_2779\_46

|                               |                                        |                                                                                                                                                                                                                                                                                                                                                                                                                                                                                                                                                                                                                                                                                                                                                                                                                                                                                                                                                                                                                                                                                                                                           |
|-------------------------------|----------------------------------------|-------------------------------------------------------------------------------------------------------------------------------------------------------------------------------------------------------------------------------------------------------------------------------------------------------------------------------------------------------------------------------------------------------------------------------------------------------------------------------------------------------------------------------------------------------------------------------------------------------------------------------------------------------------------------------------------------------------------------------------------------------------------------------------------------------------------------------------------------------------------------------------------------------------------------------------------------------------------------------------------------------------------------------------------------------------------------------------------------------------------------------------------|
| CTTTCAATCTTTTTAAAGCTTATTGGAAC | AAAGCGTTAATAAGATGATGTCCTACTCTCCAT      |  38bp<br> 38bp<br> 38bp<br> 38bp<br> 38bp<br> 38bp<br> 38bp<br> 38bp<br> 38bp<br> 38bp<br> 38bp<br> 38bp |
| TTTTCAATCTTTTTAAAGCTTATTGGAAC | CTGTTTCATCTACGGCGACAAGAAATGGATGATC     |                                                                                                                                                                                                                                                                                                                                                                                                                                                                                                                                                                                                                                                                                                                                                                                                                                                                                                                                                                                                                                                                                                                                           |
| CTTTCAATCTTTTTAAAGCTTATTGGAAC | ATAGGAGTGCTTCCAGTCAATCTTCTCTGGTATGT    |                                                                                                                                                                                                                                                                                                                                                                                                                                                                                                                                                                                                                                                                                                                                                                                                                                                                                                                                                                                                                                                                                                                                           |
| CTTTCAATCTTTTTAAAGCTTATTGGAAC | ATATATATAAATTAATTCGTTACTGTACAATAAATA   |                                                                                                                                                                                                                                                                                                                                                                                                                                                                                                                                                                                                                                                                                                                                                                                                                                                                                                                                                                                                                                                                                                                                           |
| CTTTCAATCTTTTTAAAGCTTATTGGAAC | CACCTCAGAATATGTTGAAGTTTAGGCTGTGATGCT   |                                                                                                                                                                                                                                                                                                                                                                                                                                                                                                                                                                                                                                                                                                                                                                                                                                                                                                                                                                                                                                                                                                                                           |
| CTTTCAATCTTTTTAAAGCTTATTGGAAC | ACCGAAAAGAAACCAAAAAGGAGGTTGAAATAGA     |                                                                                                                                                                                                                                                                                                                                                                                                                                                                                                                                                                                                                                                                                                                                                                                                                                                                                                                                                                                                                                                                                                                                           |
| CTTTCAATCTTTTTAAAGCTTATTGGAAC | AGCTTGATGGCTTTGAATGAAAAACTGCCCTTTGA    |                                                                                                                                                                                                                                                                                                                                                                                                                                                                                                                                                                                                                                                                                                                                                                                                                                                                                                                                                                                                                                                                                                                                           |
| CTTTCAATCTTTTTAAAGCTTATTGGAAC | TAAACTGTGAGATTGCGGCGATTTACTATA         |                                                                                                                                                                                                                                                                                                                                                                                                                                                                                                                                                                                                                                                                                                                                                                                                                                                                                                                                                                                                                                                                                                                                           |
| CTTTCAATCTTTTTAAAGCTTATTGGAAC | AAAGACAACCTGTAACAATGGTGTGCTTGTGCTGT    |                                                                                                                                                                                                                                                                                                                                                                                                                                                                                                                                                                                                                                                                                                                                                                                                                                                                                                                                                                                                                                                                                                                                           |
| CTTTCAATCTTTTTAAAGCTTATTGGAAC | TTGAAAAAGAACTCAGGAGCAATCAACCTATACAAGCA |                                                                                                                                                                                                                                                                                                                                                                                                                                                                                                                                                                                                                                                                                                                                                                                                                                                                                                                                                                                                                                                                                                                                           |

*Thermococcus litoralis* DSM 5473\_NC\_022084\_2214800\_2215162\_5\_gold standard

*Thermococcus litoralis* DSM 5473NC\_022084\_29\_2779\_40\_gold standard

> *Acidilobus saccharovorans* 345-15\_NC\_014374\_1495994-1496453+1-1050\_23

|                                                            |                                                       |                                                                                                                                                                                                                                                                                                                                                                                                                                                                                                                                                                                                                                                                                                                                                                                                                                                                                                                                                                                                                                                                                                                                                          |
|------------------------------------------------------------|-------------------------------------------------------|----------------------------------------------------------------------------------------------------------------------------------------------------------------------------------------------------------------------------------------------------------------------------------------------------------------------------------------------------------------------------------------------------------------------------------------------------------------------------------------------------------------------------------------------------------------------------------------------------------------------------------------------------------------------------------------------------------------------------------------------------------------------------------------------------------------------------------------------------------------------------------------------------------------------------------------------------------------------------------------------------------------------------------------------------------------------------------------------------------------------------------------------------------|
| GTTTCAATAAGTTTCACGGTTTACTTCTGGGAGTGAGGACCTGGATAGCCGCCACAGC | ACTTCTGGGAGTGAGGACCTGGATAGCCGCCACAGC                  |  42bp<br> 42bp<br> 42bp<br> 42bp<br> 42bp<br> 42bp<br> 42bp<br> 42bp<br> 42bp<br> 42bp<br> 42bp<br> 42bp |
| TTTTCAACACCATTCTTGGTTTC                                    | TTTCAGGATAGGAGAAATGCCAAATATGACAGAGGTGTTACGCTGTCTATGAA |                                                                                                                                                                                                                                                                                                                                                                                                                                                                                                                                                                                                                                                                                                                                                                                                                                                                                                                                                                                                                                                                                                                                                          |
| GTTTCAACACCATTCTTGGTTTC                                    | CTCCACGTCTACGGCAATGAACTGAACAGCAAGCAACGC               |                                                                                                                                                                                                                                                                                                                                                                                                                                                                                                                                                                                                                                                                                                                                                                                                                                                                                                                                                                                                                                                                                                                                                          |
| GTTTCAACACCATTCTTGGTTTC                                    | AGAAATCAGTAGTCCAGGTATAGACGTCCCAAACAGATA               |                                                                                                                                                                                                                                                                                                                                                                                                                                                                                                                                                                                                                                                                                                                                                                                                                                                                                                                                                                                                                                                                                                                                                          |
| .....                                                      |                                                       |                                                                                                                                                                                                                                                                                                                                                                                                                                                                                                                                                                                                                                                                                                                                                                                                                                                                                                                                                                                                                                                                                                                                                          |
| GTTTCAACACCATTCTTGGTTTC                                    | ACTGCCTTCAGTCCACGGTTGGCGGATAAACACTG                   |                                                                                                                                                                                                                                                                                                                                                                                                                                                                                                                                                                                                                                                                                                                                                                                                                                                                                                                                                                                                                                                                                                                                                          |
| GTTTCAACACCATTCTTGGTTTC                                    | CTGGAGAGGCCCCACAGGCCTCCCTGAGGCCAGACATCCA              |                                                                                                                                                                                                                                                                                                                                                                                                                                                                                                                                                                                                                                                                                                                                                                                                                                                                                                                                                                                                                                                                                                                                                          |
| GTTTCAACACCATTCTTGGTTTC                                    | CCATTGTAAATGAGATGTGTTACGGATCCAGAGCATAA                |                                                                                                                                                                                                                                                                                                                                                                                                                                                                                                                                                                                                                                                                                                                                                                                                                                                                                                                                                                                                                                                                                                                                                          |
| GTTTCAACACCATTCTTGGTTTC                                    | GCCGTGGAAGTAGTCTCGTGTGACCAACCTCTCCCA                  |                                                                                                                                                                                                                                                                                                                                                                                                                                                                                                                                                                                                                                                                                                                                                                                                                                                                                                                                                                                                                                                                                                                                                          |
| GTTTCAACACCATTCTTGGTTTC                                    | TGATGTAACCTGGGCGCTGACAGGTACATGTAGGTG                  |                                                                                                                                                                                                                                                                                                                                                                                                                                                                                                                                                                                                                                                                                                                                                                                                                                                                                                                                                                                                                                                                                                                                                          |

*Acidilobus saccharovorans* 345-15\_NC\_014374\_1495994\_1496411\_6\_gold standard

*Acidilobus saccharovorans* 345-15\_NC\_014374\_1\_1050\_16\_gold standard
